# Supplementary material
Source: PubMed Central journal article supplement (PMC3633104)
Supplement: NIHMS448125-supplement-1.pdf [file NIHMS448125-supplement-1.pdf]

## Supplementary Figure 1

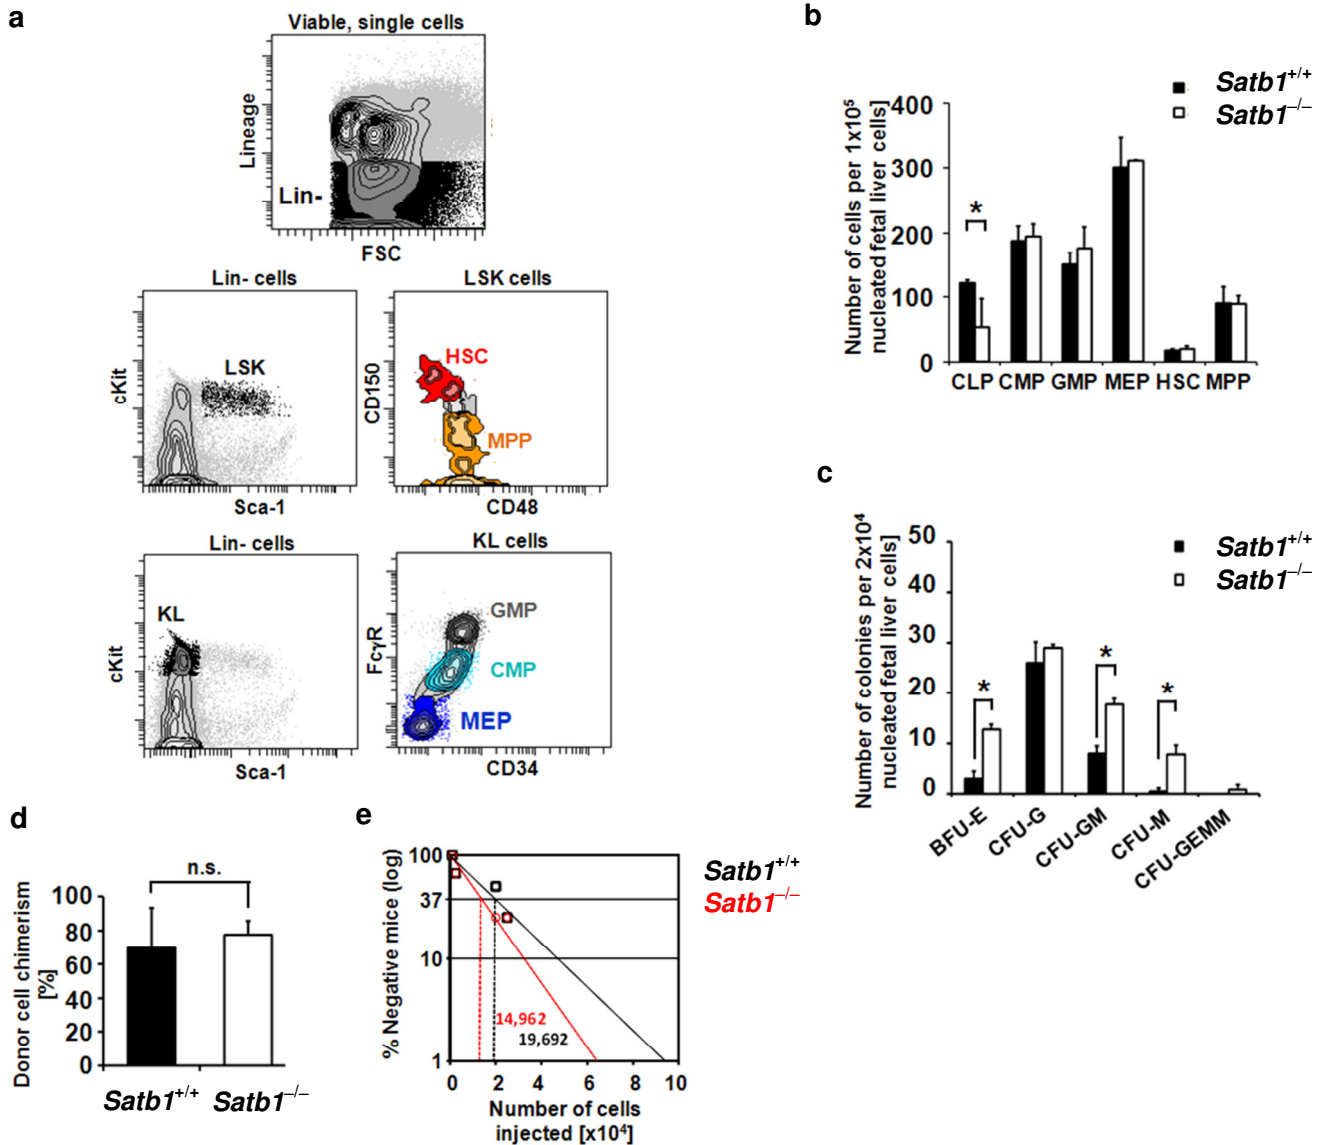

**Sorting strategy for adult HSC, MPP, CMP, GMP, MEP, and analysis of hematopoiesis in absence of *Satb1* in the fetal liver.** (a)  $CD150^+ Lin^- Sca-1^+ cKit^+$  (LSK) stem cells (HSC)  $CD150^- LSK$  multipotent progenitor cells (MPP),  $CD34^- Fc\gamma RII/III^- Sca-1^- cKit^+ Lin^-$  megakaryocytic-erythroid progenitor cells (MEP),  $CD34^+ Fc\gamma RII/III^- Sca-1^- cKit^+ Lin^-$  common myeloid progenitor cells (CMP) and  $CD34^+ Fc\gamma RII/III^+ Sca-1^- cKit^+ Lin^-$  granulocytic-monocytic progenitor cells (GMP) were purified using FACS. (b) FACS analysis of phenotypical hematopoietic stem and progenitor fetal liver cells from *Satb1* wild type (*Satb1*<sup>+/+</sup>) and *Satb1*-deficient (*Satb1*<sup>-/-</sup>) embryos at embryonic day 17-18.5 (n=2/genotype, \*p<0.05). (c) Colony formation potential of fetal myeloid progenitor cells in methylcellulose assays (n=2/genotype, \*p<0.05). (d) Analysis of repopulation capacity of *Satb1*<sup>-/-</sup> fetal liver cells by FACS analysis of donor-derived ( $CD45.2^+$ ) cells in the peripheral blood of recipient animals 24 weeks after transplantation. Shown are averages and standard deviations (two independent experiments, n=20/genotype, \*p<0.05). (e) Limiting dilution analysis of E17-18.5 *Satb1*<sup>+/+</sup> and *Satb1*<sup>-/-</sup> fetal liver cells 24 weeks after transplantation (n=3-4/cell dosage/group, two independent experiments).

## Supplementary Figure 2

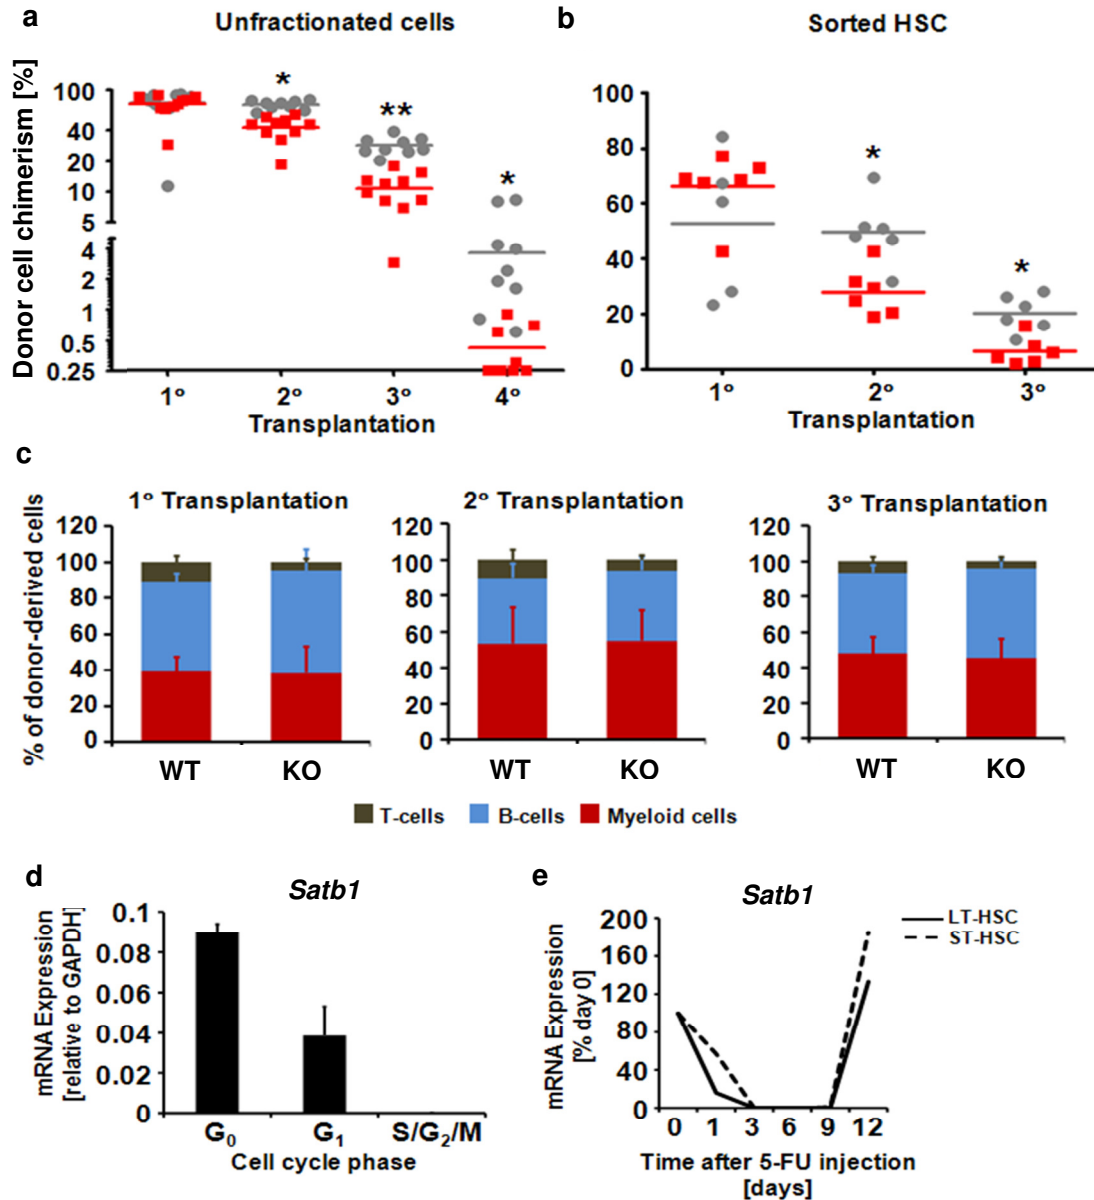

**Characterization of multilineage reconstitution in serial transplantation assay, and cell cycle dependence of *Satb1* expression.** (a) FACS analysis of total donor-cell chimerism in the peripheral blood of recipient animals 24 weeks after transplantation of *Satb1*<sup>-/-</sup> (red) or *Satb1*<sup>+/+</sup> (gray) unfractionated BM cells. Shown are averages and standard deviations (n=10/genotype; \*p<0.05, two independent experiments). (b) Transplantation of sorted HSCs. Shown are percentages of CD45.2<sup>+</sup> cells in individual recipients (n=5-6/genotype; \*p<0.05). (c) FACS analysis of donor-derived myeloid cells (CD11b<sup>+</sup> CD4<sup>-</sup> B220<sup>-</sup>), B-cells (B220<sup>+</sup> CD4<sup>-</sup> CD11b<sup>-</sup>) and T-cells (CD4<sup>+</sup> B220<sup>-</sup> CD11b<sup>-</sup>) after the first, second and third round of unfractionated CD45.2<sup>+</sup> BM cell transplantation. Shown are percentages of CD45.2<sup>+</sup> cells (n=10/genotype; \*p<0.05, two independent experiments). (d) qRT-PCR of *Satb1* mRNA expression in wild-type LSK cells in G<sub>0</sub>, G<sub>1</sub>, S-G<sub>2</sub>-M phase of the cell cycle (LSKs sorted based on Pyronin Y, Hoechst 3343 intercalation; see Fig. 2a). Shown are averages and standard deviations of *Gapdh*-normalized mRNA expression measured in technical triplicates (n=2, \*p<0.05). (e) *Satb1* mRNA expression decreases significantly upon HSC activation with 5-fluorouracil (5-FU). Shown are averages and standard deviations of *Gapdh*-normalized mRNA expression of long-term HSCs (LT-HSC; CD150<sup>+</sup> CD48<sup>-</sup> LSK) and short-term HSCs (ST-HSC; CD150<sup>+</sup> CD48<sup>+</sup> LSK) from a pool of 3 animals/time point measured in technical triplicates.

Supplementary Figure 3

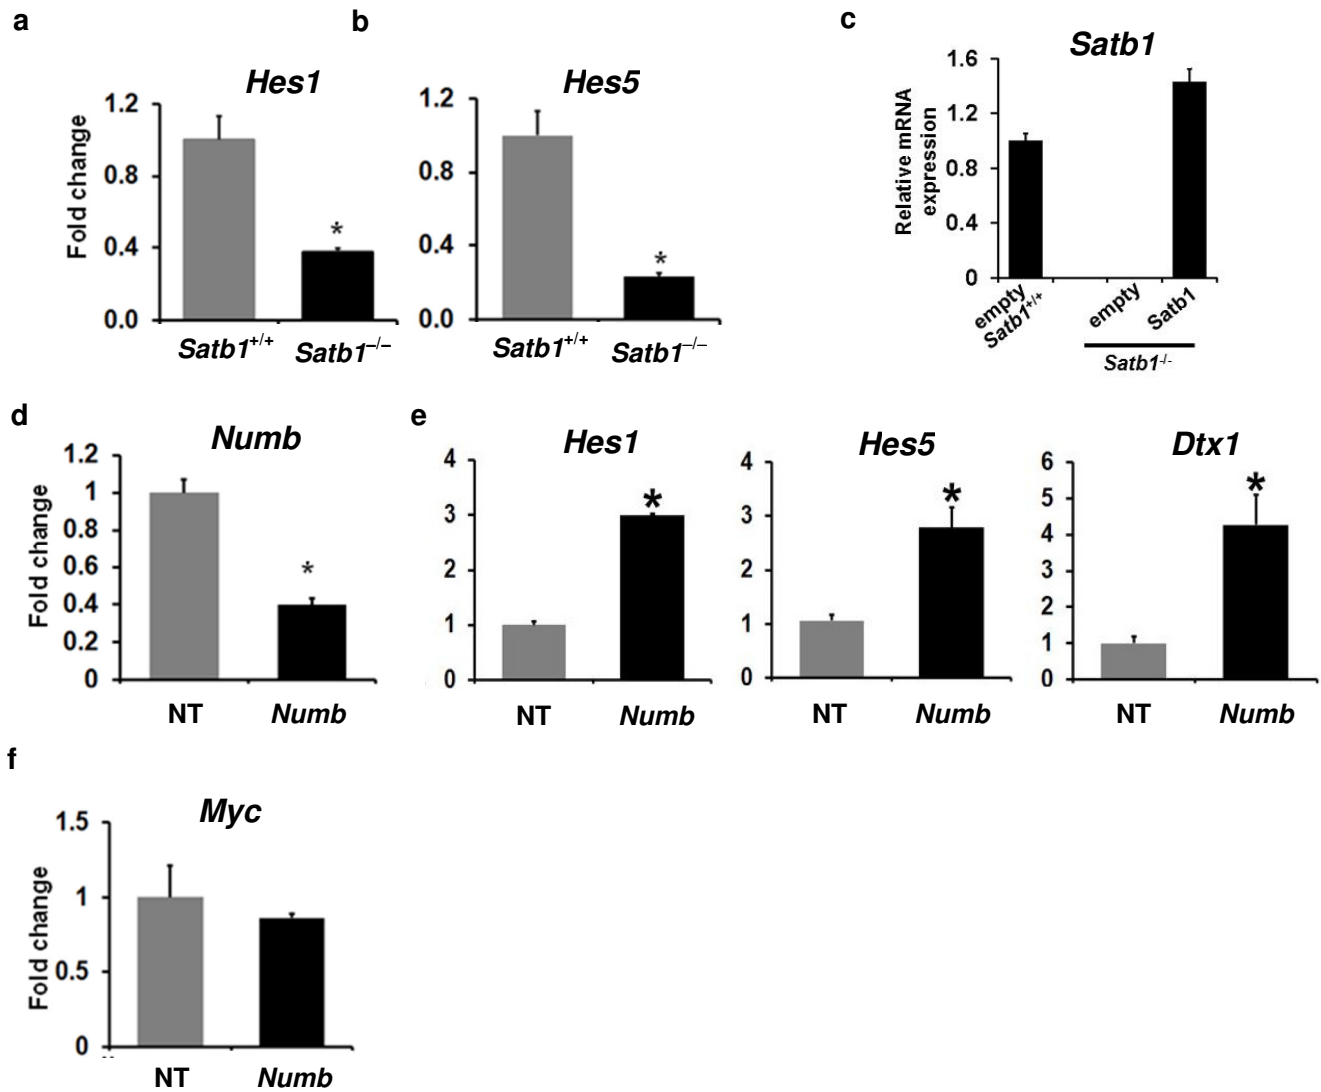

**Transcript levels in *Satb1*<sup>-/-</sup> HSC, and upon *Satb1* restoration, or *Numb* knockdown.**

(a) *Hes1* and (b) *Hes5* mRNA expression detected by qRT-PCR in *Satb1*<sup>+/+</sup> (grey bars) and *Satb1*<sup>-/-</sup> (black bars) CD150<sup>+</sup> CD48<sup>-</sup> LSK cells. Shown are averages and standard deviations normalized to *Gapdh* (n=2/genotype, \* p<0.05). (c) *Satb1* mRNA expression 48hrs after transduction and sorting of GFP<sup>+</sup> *Satb1*<sup>-/-</sup> CD150<sup>+</sup>CD48<sup>-</sup> LSK cells transduced with either *Satb1*-IRES-GFP expressing vector or empty IRES-GFP expressing vector, or of GFP<sup>+</sup> *Satb1*<sup>+/+</sup> CD150<sup>+</sup> CD48<sup>-</sup> LSK cells transduced with the empty IRES-GFP vector. Shown are averages of the fold change and standard deviations of *Gapdh*-normalized mRNA expression compared to *Satb1*<sup>+/+</sup> control transduced samples measured in technical triplicates. (d) Quantification of *Numb* mRNA expression by qRT-PCR in *Satb1*<sup>-/-</sup> CD150<sup>+</sup> CD48<sup>-</sup> LSK cells transduced with either a pool of shRNAs targeting murine *Numb* or non-targeting control (NT) shRNA-expressing lentivirus. (e) mRNA expression of Notch target genes *Hes1*, *Hes5* and *Dtx1* by qRT-PCR in *Satb1*<sup>-/-</sup> CD150<sup>+</sup> CD48<sup>-</sup> LSK cells transduced with either a pool of shRNAs targeting murine *Numb* or non-targeting control (NT) shRNA-expressing lentivirus. (f) *Myc* mRNA expression by qRT-PCR in *Satb1*<sup>-/-</sup> CD150<sup>+</sup> CD48<sup>-</sup> LSK cells transduced with either a pool of shRNAs targeting murine *Numb* or non-targeting (NT) control shRNA-expressing lentivirus. Shown are averages of the fold change and standard deviations of *Gapdh*-normalized mRNA expression compared to non-targeting control transduced samples from two independent experiments measured in technical triplicates.

# Supplementary Figure 4

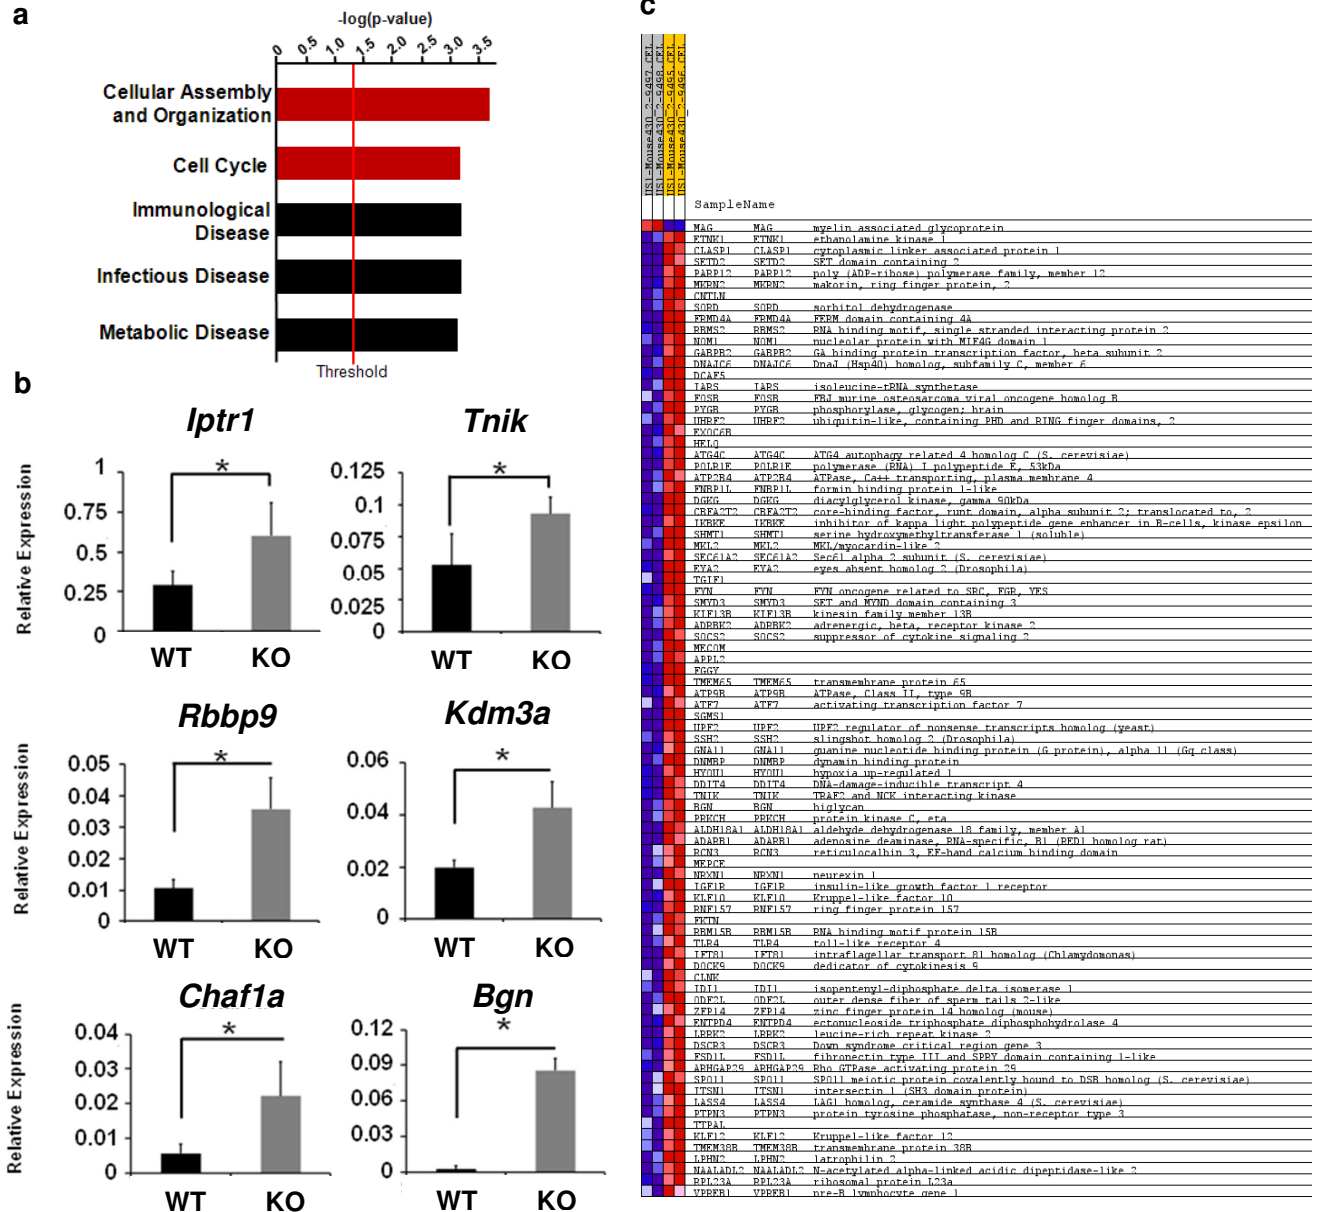

## Microarray analysis and qRT-PCR validation of *Satb1*<sup>-/-</sup> compared to wild-type CD150<sup>+</sup> LSK HSCs, and differentially expressed genes within the MYC\_CHIP\_PET\_2PLUS signature.

(a) Ingenuity Pathway Analysis (IPA) analysis of differentially expressed genes in donor-derived, *Satb1*<sup>-/-</sup> CD150<sup>+</sup> LSKs. Shown are the top five networks of *Satb1*-dependent genes in HSCs. Threshold cut-off  $-\log(p\text{-value})$ : 1.4. (b) Validation of differentially expressed genes in a second set of sorted donor-derived HSCs from *Satb1*<sup>+/+</sup> and *Satb1*<sup>-/-</sup> cell recipients by quantitative real-time PCR. Shown are averages and standard deviations of *Gapdh*-normalized mRNA expression; n=3-5/genotype, \* p<0.05. (c) Differentially expressed genes within the MYC\_CHIP\_PET\_2PLUS dataset in absence of *Satb1* in HSCs. Shown is a list of genes differentially expressed in absence of *Satb1* which have been identified as directly bound by Myc. Shown is the GSEA list and expression values (blue = low expression, red = high expression) of individual *Satb1*<sup>+/+</sup> (gray) and *Satb1*<sup>-/-</sup> (yellow) CD150<sup>+</sup> LSK cells as assessed by microarray analysis.

Supplementary Figure 5

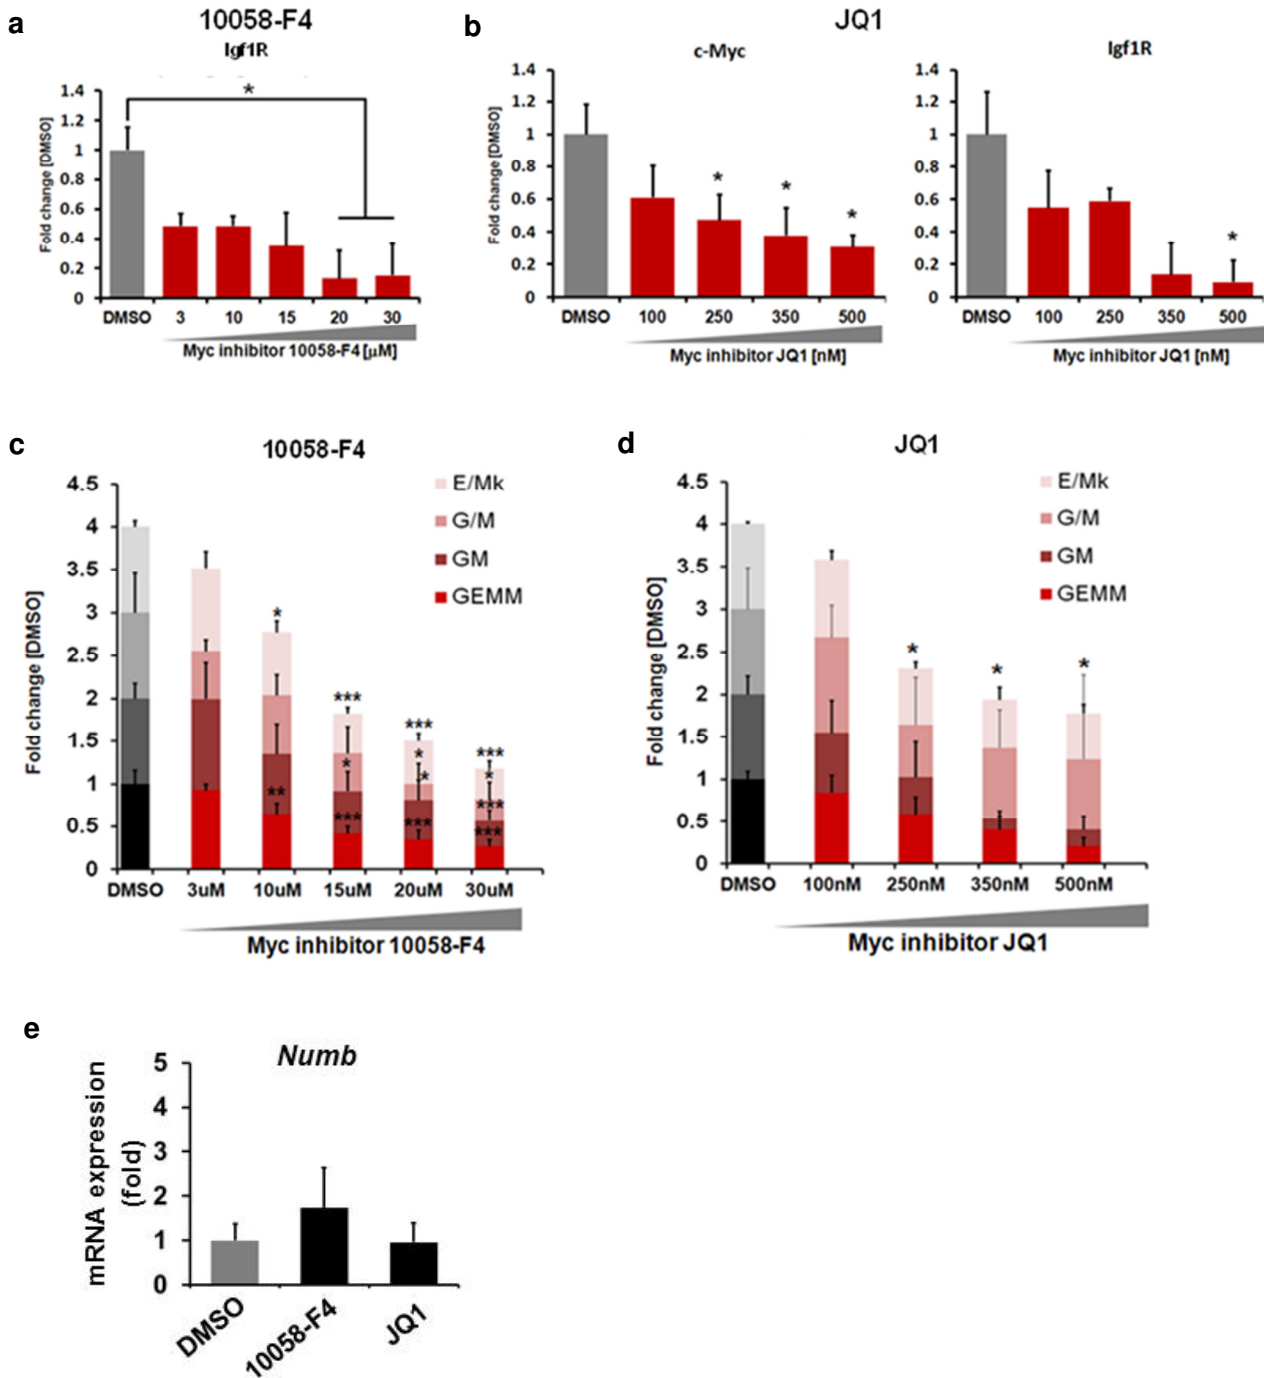

**Myc inhibition in *Satb1*<sup>-/-</sup> CD150<sup>+</sup> CD48<sup>-</sup> LSK HSCs using different concentrations of two small molecule inhibitors, 10058-F4 and JQ1. (a,c,e)** Treatment of HSCs with 10058-F4 (concentrations indicated in graph) (b,d,f) JQ1 (concentrations indicated in graph) or 1% DMSO. Quantification of (a) *Igf1R*, and (b) *Myc* and *Igf1R* expression 48hrs after treatment by qRT-PCR. Shown are averages and standard deviations normalized to *Gapdh* as fold change compared to DMSO-treated controls (n=2/genotype, \* p<0.05). (c,d) Colony formation assay of Myc inhibitor-treated HSCs in semisolid medium. Shown are averages and standard deviations of BFU-E, CFU-G/M, CFU-GM, and CFU-GEMM. CD150<sup>+</sup> CD48<sup>-</sup> KSL were plated in semisolid medium and colonies were scored (n=2/genotype; \* p<0.05, \*\* p<0.01, \*\*\* p<0.005). (e) Quantification of *Numb* mRNA expression 48hrs after treatment by qRT-PCR. Shown are averages and standard deviations normalized to *Gapdh* as fold change compared to DMSO-treated controls (n=2/genotype).



Supplementary Figure 6

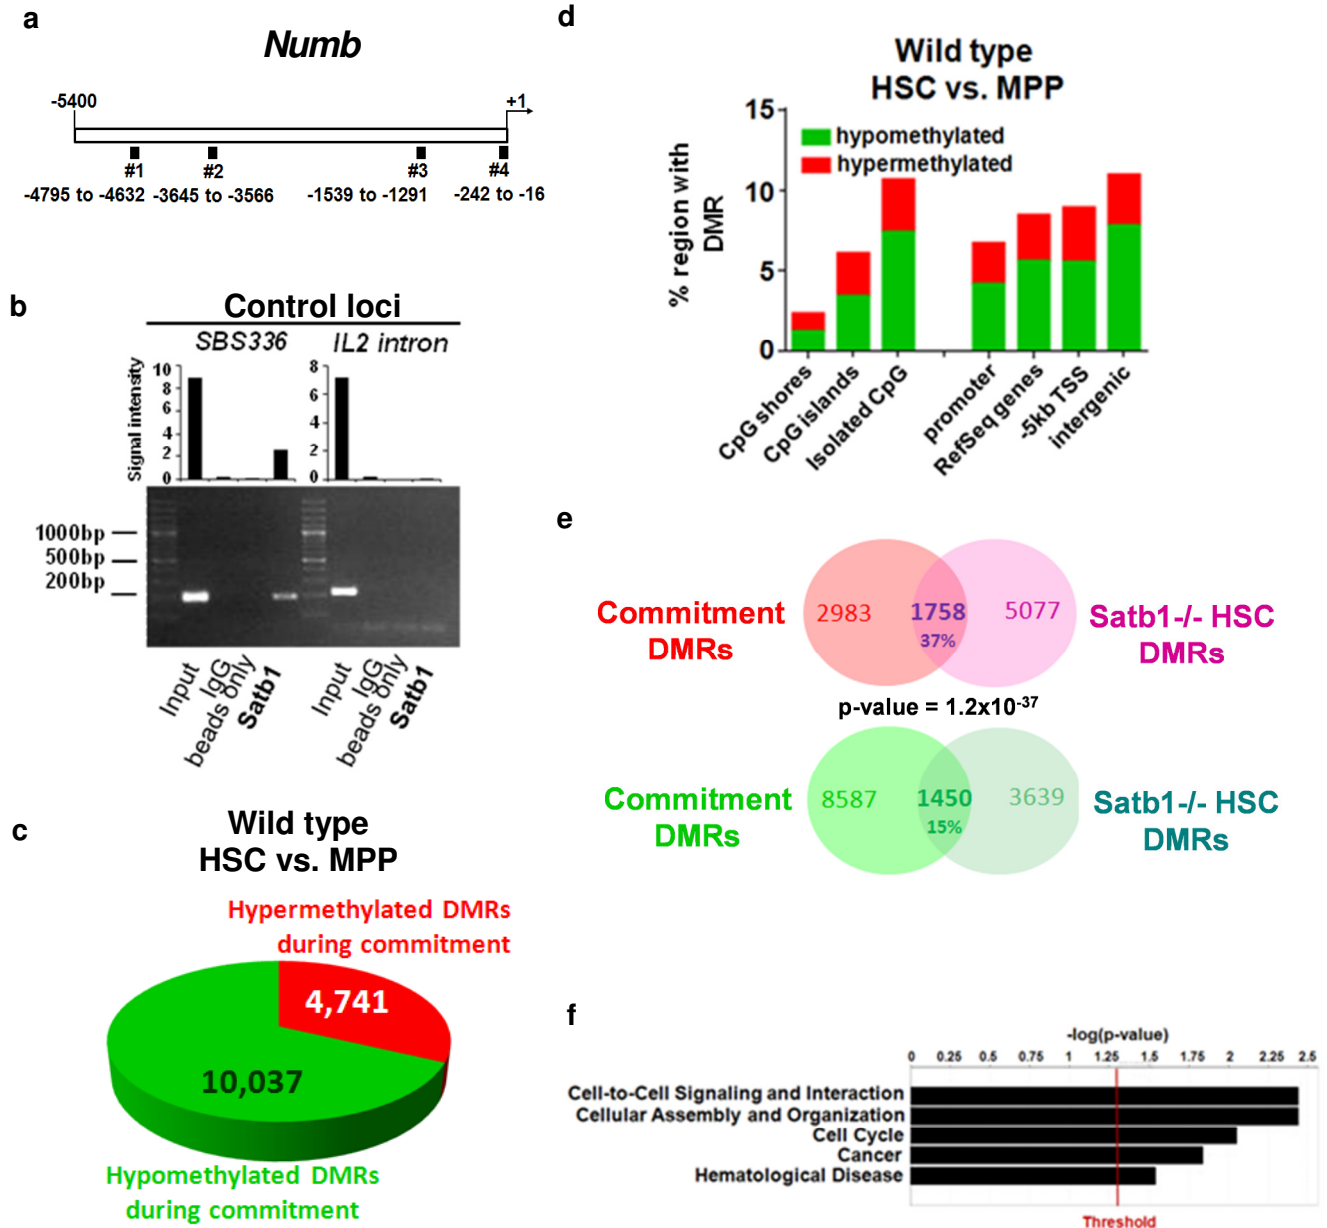

**Epigenetic alterations in *Satb1*<sup>-/-</sup> HSCs.** (a) Assessment of *Satb1* binding to the candidate sites after ChIP in HPC7 cells by PCR. Shown is a schematic depicting primer locations in *Numb* locus interrogating *Satb1* binding. (b) PCR of the *Satb1* binding site SBS336 was used as a positive control, and an IL2 intron site was used as a negative control for *Satb1* binding. Bar graphs show the quantification of signal intensities of the PCR products. (c) Representation of differentially hyper- and hypomethylated regions found during transition from wild type CD150<sup>+</sup> LSK HSCs to wild-type CD150<sup>-</sup> LSK MPPs (“commitment DMRs”). (d) Distribution of differentially methylated regions (DMR, 1kb tiles) within CpG shores, islands, and isolated CpGs as well as in the promoter (5kb upstream), RefSeq gene regions, 5kb downstream and in intergenic regions in wild-type HSCs compared to wild-type MPPs. (e) Intersection of “commitment DMRs” with *Satb1* knockout-associated HSC-specific DMRs (“*Satb1*<sup>-/-</sup> HSC DMRs”) showing a high similarity between *Satb1*<sup>-/-</sup> HSC DMRs and methylation changes occurring in the transition from wild-type HSC to MPP, indicating a commitment-primed epigenetic stage of *Satb1*-deficient HSCs. Shown are Venn diagrams for hypermethylated (red) and hypomethylated (green) regions (overall p=1.2x10<sup>-37</sup>; hypergeometrical testing). (f) Ingenuity Pathway analysis of the set of genes with altered expression and DNA cytosine methylation in *Satb1*<sup>-/-</sup> HSCs. Shown are the top five functional pathways with a significant enrichment with a threshold cut-off: -log(p-value) of 1.3.

Supplementary Table 1. Differentially expressed genes in *Satb1*<sup>-/-</sup> HSCs.

| Probeset ID | Gene title                                                                                                                 | Gene Symbol                                                                                  | log2 FC |
|-------------|----------------------------------------------------------------------------------------------------------------------------|----------------------------------------------------------------------------------------------|---------|
| 10538882    | predicted gene, EG434025                                                                                                   | EG434025                                                                                     | 3.28    |
| 10494262    | cathepsin K                                                                                                                | Ctsk                                                                                         | 3.02    |
| 10400072    | scinderin                                                                                                                  | Scin                                                                                         | 2.84    |
| 10438415    | immunoglobulin lambda chain, variable 2   immunoglobulin lambda chain, constant region 2                                   | IgI-V2   IgI-C2                                                                              | 2.21    |
| 10502770    | similar to calcium-independent alpha-latrotoxin receptor homolog 2   latrophilin 2                                         | Lphn2   LOC100048050                                                                         | 2.20    |
| 10438064    | pre-B lymphocyte gene 1                                                                                                    | Vpreb1                                                                                       | 1.88    |
| 10504757    | cDNA sequence BC005685                                                                                                     | BC005685                                                                                     | 1.88    |
| 10401935    | cDNA sequence BC005685                                                                                                     | BC005685                                                                                     | 1.79    |
| 10538901    | cDNA sequence BC005685                                                                                                     | BC005685                                                                                     | 1.79    |
| 10608107    | ubiquitously transcribed tetratricopeptide repeat gene, Y chromosome                                                       | Uty                                                                                          | 1.69    |
| 10403060    | immunoglobulin heavy variable V1-72   similar to Ig heavy chain V-II region SESS precursor   immunoglobulin heavy chain Ia | Igh-VJ558   AB069917   Igh-Ia   V165-D-J-C mu   LOC546230   LOC382693   LOC631518   Ighv1-72 | 1.55    |
| 10503176    | chromodomain helicase DNA binding protein 7                                                                                | Chd7                                                                                         | 1.53    |
| 10608001    | eukaryotic translation initiation factor 2, subunit 3, structural gene Y-linked                                            | Eif2s3y                                                                                      | 1.52    |
| 10590842    | predicted gene, ENSMUSG00000074512                                                                                         | ENSMUSG00000074512                                                                           | 1.44    |
| 10504755    | predicted gene, ENSMUSG00000056897                                                                                         | ENSMUSG00000056897                                                                           | 1.32    |
| 10428209    | predicted gene, ENSMUSG00000072618                                                                                         | ENSMUSG00000072618                                                                           | 1.28    |
| 10515702    | cDNA sequence BC059842                                                                                                     | BC059842                                                                                     | 1.25    |
| 10522666    | RIKEN cDNA 2310040G07 gene                                                                                                 | 2310040G07Rik                                                                                | 1.23    |
| 10607738    | carbonic anhydrase 5b, mitochondrial                                                                                       | Car5b                                                                                        | 1.23    |
| 10513152    | protein tyrosine phosphatase, non-receptor type 3                                                                          | Ptpn3                                                                                        | 1.22    |
| 10428594    | sterile alpha motif domain containing 12                                                                                   | Samd12                                                                                       | 1.20    |
| 10445373    | RIKEN cDNA B230354K17 gene                                                                                                 | B230354K17Rik                                                                                | 1.18    |
| 10513156    | protein tyrosine phosphatase, non-receptor type 3                                                                          | Ptpn3                                                                                        | 1.09    |
| 10455112    | protocadherin beta 17                                                                                                      | Pcdhb17                                                                                      | 1.09    |
| 10363455    | pterin 4 alpha carbinolamine dehydratase/dimerization cofactor of hepatocyte nuclear factor 1 alpha (TCF1) 1               | Pcbd1                                                                                        | 1.08    |
| 10368173    | RIKEN cDNA 4933406P04 gene                                                                                                 | 4933406P04Rik                                                                                | 1.08    |
| 10386169    | predicted gene, ENSMUSG00000053218                                                                                         | ENSMUSG00000053218                                                                           | 1.07    |
| 10352133    | EF-hand calcium binding domain 2                                                                                           | Efcab2                                                                                       | 1.07    |
| 10346678    | calcium response factor                                                                                                    | Carf                                                                                         | 1.07    |
| 10511779    | ATPase, H <sup>+</sup> transporting, lysosomal V0 subunit D2                                                               | Atp6v0d2                                                                                     | 1.07    |
| 10579012    | chondroitin sulfate N-acetylgalactosaminyltransferase 1                                                                    | Csgalnact1                                                                                   | 1.06    |
| 10394674    | predicted gene, ENSMUSG00000050974                                                                                         | ENSMUSG00000050974                                                                           | 1.05    |
| 10562963    | DNA segment, Chr 7, Brigham & Women's Genetics 0826 expressed                                                              | D7Bwg0826e                                                                                   | 1.05    |
| 10579958    | interleukin 15                                                                                                             | Il15                                                                                         | 1.04    |
| 10560818    | zinc finger protein 111                                                                                                    | Zfp111                                                                                       | 1.02    |
| 10558398    | RIKEN cDNA 5430417C01 gene                                                                                                 | 5430417C01Rik                                                                                | 1.01    |
| 10502772    | latrophilin 2                                                                                                              | Lphn2                                                                                        | 1.00    |
| 10569972    | LAG1 homolog, ceramide synthase 4                                                                                          | Lass4                                                                                        | 1.00    |
| 10415787    | potassium channel regulator                                                                                                | Kcnrg                                                                                        | 0.98    |
| 10413012    | fucosyltransferase 11                                                                                                      | Fut11                                                                                        | 0.98    |
| 10388784    | ribosomal protein L23a                                                                                                     | Rpl23a                                                                                       | 0.98    |
| 10593050    | interleukin 10 receptor, alpha                                                                                             | Il10ra                                                                                       | 0.98    |
| 10415413    | cDNA sequence BC030046                                                                                                     | BC030046                                                                                     | 0.98    |
| 10528482    | cDNA sequence BC050254                                                                                                     | BC050254                                                                                     | 0.96    |
| 10416199    | ectonucleoside triphosphate diphosphohydrolase 4                                                                           | Entpd4                                                                                       | 0.96    |
| 10344952    | retinol dehydrogenase 10 (all-trans)                                                                                       | Rdh10                                                                                        | 0.96    |
| 10420846    | frizzled homolog 3 (Drosophila)                                                                                            | Fzd3                                                                                         | 0.95    |
| 10469571    | OTU domain containing 1                                                                                                    | Otud1                                                                                        | 0.95    |

|          |                                                                                                                |                                                 |             |
|----------|----------------------------------------------------------------------------------------------------------------|-------------------------------------------------|-------------|
| 10441933 | RIKEN cDNA 9030025P20 gene   hypothetical protein<br>LOC100041621   RIKEN cDNA 2210404J11 gene                 | 2210404J11Rik   LOC100041621  <br>9030025P20Rik | <b>0.94</b> |
| 10513158 | protein tyrosine phosphatase, non-receptor type 3                                                              | Ptpn3                                           | <b>0.94</b> |
| 10403018 | immunoglobulin heavy chain Ia   immunoglobulin heavy<br>chain (J558 family)   Ig mu chain V region AC38 205.12 | Igh-VJ558   Igh-Ia   IghmAC38.205.12            | <b>0.94</b> |
| 10566668 | similar to suppressor of cytokine signaling 6                                                                  | LOC675799                                       | <b>0.94</b> |
| 10495343 | WD repeat domain 47                                                                                            | Wdr47                                           | <b>0.93</b> |
| 10514892 | RIKEN cDNA 2210012G02 gene                                                                                     | 2210012G02Rik                                   | <b>0.93</b> |
| 10422013 | Kruppel-like factor 12                                                                                         | Klf12                                           | <b>0.93</b> |
| 10528038 | a disintegrin and metallopeptidase domain 22                                                                   | Adam22                                          | <b>0.92</b> |
| 10449687 | radial spoke head 1 homolog (Chlamydomonas)                                                                    | Rsph1                                           | <b>0.91</b> |
| 10601519 | kelch-like 4 (Drosophila)                                                                                      | Klhl4                                           | <b>0.91</b> |
| 10442606 | RIKEN cDNA 4930528F23 gene                                                                                     | 4930528F23Rik                                   | <b>0.90</b> |
| 10383206 | hypothetical LOC672511                                                                                         | LOC672511                                       | <b>0.90</b> |
| 10531201 | a disintegrin-like and metallopeptidase (reprolysin type)<br>with thrombospondin type 1 motif, 3               | Adamts3                                         | <b>0.90</b> |
| 10501235 | glutathione S-transferase, mu 4                                                                                | Gstm4                                           | <b>0.90</b> |
| 10440926 | DnaJ (Hsp40) homolog, subfamily C, member 28                                                                   | Dnajc28                                         | <b>0.90</b> |
| 10452613 | Rho GTPase activating protein 28                                                                               | Arhgap28                                        | <b>0.90</b> |
| 10403964 | zinc finger protein 184 (Kruppel-like)                                                                         | Zfp184                                          | <b>0.89</b> |
| 10478401 | tocopherol (alpha) transfer protein-like                                                                       | Ttpal                                           | <b>0.88</b> |
| 10445071 | zinc finger protein 57                                                                                         | Zfp57                                           | <b>0.87</b> |
| 10600357 | tafazzin                                                                                                       | Taz                                             | <b>0.87</b> |
| 10508614 | fatty acid binding protein 3, muscle and heart                                                                 | Fabp3                                           | <b>0.87</b> |
| 10502776 | similar to calcium-independent alpha-latrotoxin receptor<br>homolog 2   latrophilin 2                          | Lphn2   LOC100048050                            | <b>0.87</b> |
| 10543249 | predicted gene, EG232599                                                                                       | EG232599                                        | <b>0.87</b> |
| 10505998 | FGGY carbohydrate kinase domain containing                                                                     | Fggy                                            | <b>0.87</b> |
| 10505994 | FGGY carbohydrate kinase domain containing                                                                     | Fggy                                            | <b>0.86</b> |
| 10454398 | expressed sequence AW554918                                                                                    | AW554918                                        | <b>0.86</b> |
| 10577096 | PCI domain containing 2                                                                                        | Pcid2                                           | <b>0.85</b> |
| 10579607 | UDP-GlcNAc:betaGal beta-1,3-N-<br>acetylglucosaminyltransferase 3                                              | B3gnt3                                          | <b>0.85</b> |
| 10391454 | vesicle amine transport protein 1 homolog (T californica)                                                      | Vat1                                            | <b>0.85</b> |
| 10538811 | PR domain containing 5                                                                                         | Prdm5                                           | <b>0.85</b> |
| 10515086 | RIKEN cDNA 9630013D21 gene                                                                                     | 9630013D21Rik                                   | <b>0.84</b> |
| 10367982 | G protein-coupled receptor 126                                                                                 | Gpr126                                          | <b>0.84</b> |
| 10497501 | N-acetylated alpha-linked acidic dipeptidase-like 2                                                            | Naaladl2                                        | <b>0.84</b> |
| 10455901 | solute carrier family 27 (fatty acid transporter), member 6                                                    | Slc27a6                                         | <b>0.84</b> |
| 10578623 | WW, C2 and coiled-coil domain containing 2                                                                     | Wwc2                                            | <b>0.84</b> |
| 10346810 | par-3 partitioning defective 3 homolog B (C. elegans)                                                          | Pard3b                                          | <b>0.84</b> |
| 10585338 | KDEL (Lys-Asp-Glu-Leu) containing 2                                                                            | Kdelc2                                          | <b>0.84</b> |
| 10515698 | cDNA sequence BC059842                                                                                         | BC059842                                        | <b>0.84</b> |
| 10352503 | bisphosphate 3'-nucleotidase 1                                                                                 | Bpnt1                                           | <b>0.83</b> |
| 10444821 | histocompatibility 2, Q region locus 8                                                                         | H2-Q8                                           | <b>0.83</b> |
| 10467162 | pantothenate kinase 1                                                                                          | Pank1                                           | <b>0.83</b> |
| 10408477 | E2F transcription factor 3                                                                                     | E2f3                                            | <b>0.83</b> |
| 10436892 | intersectin 1 (SH3 domain protein 1A)                                                                          | Itsn1                                           | <b>0.83</b> |
| 10514510 | cytochrome P450, family 2, subfamily j, polypeptide 6                                                          | Cyp2j6                                          | <b>0.83</b> |
| 10431935 | adhesion molecule with Ig like domain 2                                                                        | Amigo2                                          | <b>0.82</b> |
| 10576354 | AFG3(ATPase family gene 3)-like 1 (yeast)                                                                      | Afg3l1                                          | <b>0.82</b> |
| 10441064 | Down syndrome critical region gene 3                                                                           | Dscr3                                           | <b>0.82</b> |
| 10396606 | synaptic nuclear envelope 2                                                                                    | Syne2                                           | <b>0.81</b> |
| 10382200 | coiled-coil domain containing 46                                                                               | Ccdc46                                          | <b>0.81</b> |
| 10546803 | predicted gene, ENSMUSG00000072853                                                                             | ENSMUSG00000072853                              | <b>0.81</b> |
| 10383208 | hypothetical LOC672511                                                                                         | LOC672511                                       | <b>0.81</b> |
| 10487392 | Kv channel interacting protein 3, calsenilin                                                                   | Kcnip3                                          | <b>0.80</b> |
| 10354979 | amyotrophic lateral sclerosis 2 (juvenile) homolog<br>(human)                                                  | Als2                                            | <b>0.80</b> |
| 10564507 | arrestin domain containing 4                                                                                   | Arrdc4                                          | <b>0.80</b> |
| 10598107 | TATA box binding protein (Tbp)-associated factor, RNA                                                          | Taf1a                                           | <b>0.80</b> |



|          |                                                                                     |                            |             |
|----------|-------------------------------------------------------------------------------------|----------------------------|-------------|
|          | polymerase I, A                                                                     |                            |             |
| 10413574 | Scm-like with four mbt domains 1                                                    | Sfmbt1                     | <b>0.79</b> |
| 10443027 | RIKEN cDNA A930001N09 gene                                                          | A930001N09Rik              | <b>0.79</b> |
| 10543120 | islet cell autoantigen 1                                                            | Ica1                       | <b>0.79</b> |
| 10401968 | galactosylceramidase                                                                | Galc                       | <b>0.79</b> |
| 10529711 | cytokine-dependent hematopoietic cell linker                                        | Clnk                       | <b>0.78</b> |
| 10458247 | leucine rich repeat transmembrane neuronal 2                                        | Lrrtm2                     | <b>0.78</b> |
| 10371502 | fatty acid binding protein 3, muscle and heart                                      | Fabp3                      | <b>0.78</b> |
| 10443110 | synaptic Ras GTPase activating protein 1 homolog (rat)                              | Syngap1                    | <b>0.78</b> |
| 10411059 | zinc finger, FYVE domain containing 16                                              | Zfyve16                    | <b>0.78</b> |
| 10534679 | tripartite motif-containing 56                                                      | Trim56                     | <b>0.78</b> |
| 10444824 | histocompatibility 2, Q region locus 6                                              | H2-Q6                      | <b>0.77</b> |
| 10575578 | RIKEN cDNA 4930402E16 gene                                                          | 4930402E16Rik              | <b>0.77</b> |
| 10403081 | WD repeat domain 60                                                                 | Wdr60                      | <b>0.77</b> |
| 10479981 | GATA binding protein 3                                                              | Gata3                      | <b>0.76</b> |
| 10512470 | CD72 antigen                                                                        | CD72                       | <b>0.76</b> |
| 10600825 | zinc finger CCCH-type containing 12B                                                | Zc3h12b                    | <b>0.76</b> |
| 10515930 | expressed sequence AA415398                                                         | AA415398                   | <b>0.76</b> |
| 10416655 | predicted gene, EG432879                                                            | EG432879                   | <b>0.76</b> |
| 10368486 | ring finger protein 146                                                             | Rnf146                     | <b>0.75</b> |
| 10496638 | outer dense fiber of sperm tails 2-like                                             | Odf2l                      | <b>0.75</b> |
| 10527918 | mitochondrial transcription termination factor   predicted gene, ENSMUSG00000053178 | Mterf   ENSMUSG00000053178 | <b>0.75</b> |
| 10523880 | RNA polymerase II associated protein 2                                              | Rpap2                      | <b>0.75</b> |
| 10530013 | gene model 447, (NCBI)                                                              | Gm447                      | <b>0.75</b> |
| 10511975 | solute carrier family 35 (CMP-sialic acid transporter), member 1                    | Slc35a1                    | <b>0.75</b> |
| 10484402 | catenin (cadherin associated protein), delta 1                                      | Ctnnd1                     | <b>0.75</b> |
| 10444591 | heat shock protein 1-like                                                           | Hspa1l                     | <b>0.75</b> |
| 10559644 | cDNA sequence BC022651                                                              | BC022651                   | <b>0.74</b> |
| 10532582 | myosin XVIIIb                                                                       | Myo18b                     | <b>0.74</b> |
| 10504761 | hypothetical protein LOC641050                                                      | LOC641050                  | <b>0.74</b> |
| 10542040 | poly (ADP-ribose) polymerase family, member 11                                      | Parp11                     | <b>0.74</b> |
| 10422436 | dedicator of cytokinesis 9                                                          | Dock9                      | <b>0.74</b> |
| 10380871 | olfactory receptor 869   START domain containing 3                                  | Stard3   Olfr869           | <b>0.74</b> |
| 10392983 | solute carrier family 25 (mitochondrial thiamine pyrophosphate carrier), member 19  | Slc25a19                   | <b>0.74</b> |
| 10553897 | myotubularin related protein 10                                                     | Mtmr10                     | <b>0.74</b> |
| 10440576 | zinc finger protein 294                                                             | Zfp294                     | <b>0.74</b> |
| 10575706 | WW domain-containing oxidoreductase                                                 | Wwox                       | <b>0.74</b> |
| 10554094 | insulin-like growth factor I receptor                                               | Igf1r                      | <b>0.73</b> |
| 10605766 | melanoma antigen, family D, 1                                                       | Maged1                     | <b>0.73</b> |
| 10533504 | intraflagellar transport 81 homolog (Chlamydomonas)                                 | Ift81                      | <b>0.73</b> |
| 10498357 | RIKEN cDNA F630111L10 gene                                                          | F630111L10Rik              | <b>0.73</b> |
| 10407792 | G protein-coupled receptor 137B   G protein-coupled receptor 137B, pseudogene       | Gpr137b-ps   Gpr137b       | <b>0.73</b> |
| 10534921 | methylphosphate capping enzyme                                                      | Mepce                      | <b>0.73</b> |
| 10505071 | transmembrane protein 38B                                                           | Tmem38b                    | <b>0.73</b> |
| 10607302 | guanine nucleotide binding protein-like 3 (nucleolar)-like                          | Gnl3l                      | <b>0.72</b> |
| 10403413 | isopentenyl-diphosphate delta isomerase                                             | Idi1                       | <b>0.72</b> |
| 10541191 | RAD52 homolog (S. cerevisiae)                                                       | Rad52                      | <b>0.72</b> |
| 10560832 | zinc finger protein 61                                                              | Zfp61                      | <b>0.72</b> |
| 10561799 | zinc finger protein 74                                                              | Zfp74                      | <b>0.72</b> |
| 10357239 | transmembrane protein 37                                                            | Tmem37                     | <b>0.72</b> |
| 10561810 | zinc finger protein 14                                                              | Zfp14                      | <b>0.72</b> |
| 10512682 | zinc finger and BTB domain containing 5                                             | Zbtb5                      | <b>0.71</b> |
| 10551803 | zinc finger protein 568                                                             | Zfp568                     | <b>0.71</b> |
| 10389151 | schlafen 8   schlafen 10                                                            | Slfn8   Slfn10             | <b>0.71</b> |
| 10541683 | complement component C1rb   complement component 1, r subcomponent                  | C1r   C1rb                 | <b>0.71</b> |
| 10356423 | ubiquitin specific peptidase 40                                                     | Usp40                      | <b>0.70</b> |

|          |                                                                          |               |      |
|----------|--------------------------------------------------------------------------|---------------|------|
| 10563077 | reticulocalbin 3, EF-hand calcium binding domain                         | Rcn3          | 0.70 |
| 10390505 | ribosomal protein L23                                                    | Rpl23         | 0.70 |
| 10389134 | schlafen 9                                                               | Sln9          | 0.70 |
| 10392098 | FtsJ homolog 3 (E. coli)                                                 | Ftsj3         | 0.70 |
| 10592471 | GRAM domain containing 1B                                                | Gramd1b       | 0.70 |
| 10505517 | toll-like receptor 4                                                     | Tlr4          | 0.70 |
| 10428302 | Kruppel-like factor 10                                                   | Klf10         | 0.69 |
| 10586384 | programmed cell death 7                                                  | Pdcd7         | 0.69 |
| 10440077 | RIKEN cDNA 2610528E23 gene                                               | 2610528E23Rik | 0.69 |
| 10538892 | hypothetical protein LOC641050                                           | LOC641050     | 0.69 |
| 10396442 | small nuclear RNA activating complex, polypeptide 1                      | Snopc1        | 0.69 |
| 10489266 | chromodomain helicase DNA binding protein 6                              | Chd6          | 0.68 |
| 10421214 | Rho-related BTB domain containing 2                                      | Rhobtb2       | 0.68 |
| 10477717 | protein C receptor, endothelial                                          | Procr         | 0.68 |
| 10564520 | ribosomal protein L23                                                    | Rpl23         | 0.68 |
| 10442691 | chloride channel 7                                                       | Clcn7         | 0.68 |
| 10571312 | dual specificity phosphatase 4                                           | Dusp4         | 0.68 |
| 10469083 | UPF2 regulator of nonsense transcripts homolog (yeast)                   | Upf2          | 0.68 |
| 10396402 | protein kinase C, eta                                                    | Prkch         | 0.67 |
| 10491877 | DNA segment, Chr 3, ERATO Doi 751, expressed                             | D3Erd751e     | 0.67 |
| 10383198 | hypothetical LOC672511                                                   | LOC672511     | 0.67 |
| 10605811 | RIKEN cDNA 2810002O09 gene                                               | 2810002O09Rik | 0.67 |
| 10596568 | RNA binding motif protein 15B                                            | Rbm15b        | 0.67 |
| 10584712 | hypoxia up-regulated 1                                                   | Hyou1         | 0.67 |
| 10542875 | RIKEN cDNA 3010003L21 gene                                               | 3010003L21Rik | 0.67 |
| 10352178 | saccharopine dehydrogenase (putative)                                    | Sccpdh        | 0.67 |
| 10542896 | bicaudal D homolog 1 (Drosophila)                                        | Bicd1         | 0.66 |
| 10475946 | zinc finger CCCH type containing 6                                       | Zc3h6         | 0.66 |
| 10407481 | phosphofructokinase, platelet                                            | Pfcp          | 0.66 |
| 10453518 | neurexin I                                                               | Nrxn1         | 0.66 |
| 10505030 | fibronectin type III and SPRY domain containing 1-like                   | Fsd1l         | 0.66 |
| 10436451 | syntaxin 19                                                              | Stx19         | 0.66 |
| 10501860 | formin binding protein 1-like                                            | Fbnp1l        | 0.66 |
| 10414433 | RIKEN cDNA 6720456H20 gene                                               | 6720456H20Rik | 0.66 |
| 10482301 | RIKEN cDNA A930041I02 gene                                               | A930041I02Rik | 0.66 |
| 10495685 | Rho GTPase activating protein 29                                         | Arhgap29      | 0.66 |
| 10421517 | cysteinyl leukotriene receptor 2                                         | Cysltr2       | 0.66 |
| 10380252 | coilin                                                                   | Coil          | 0.66 |
| 10393272 | ring finger protein 157                                                  | Rnf157        | 0.66 |
| 10439532 | queuine tRNA-ribosyltransferase domain containing 1                      | Qtrtd1        | 0.65 |
| 10388734 | Era (G-protein)-like 1 (E. coli)                                         | Eral1         | 0.65 |
| 10449631 | BTB (POZ) domain containing 9                                            | Btbd9         | 0.65 |
| 10462613 | interferon-induced protein with tetratricopeptide repeats 2              | Ift2          | 0.64 |
| 10557033 | eukaryotic elongation factor-2 kinase                                    | Eef2k         | 0.64 |
| 10372383 | zinc finger, DHHC domain containing 17                                   | Zdhhc17       | 0.64 |
| 10546710 | SHQ1 homolog (S. cerevisiae)                                             | Shq1          | 0.64 |
| 10454828 | prenatal ethanol induced mRNA, pseudogene                                | Pnet-ps       | 0.64 |
| 10488944 | ubiquinol-cytochrome c reductase complex chaperone, CBP3 homolog (yeast) | Uqcc          | 0.64 |
| 10383192 | hypothetical LOC672511                                                   | LOC672511     | 0.64 |
| 10377982 | kinesin family member 1C                                                 | Kif1c         | 0.64 |
| 10448459 | TBC1 domain family, member 24                                            | Tbc1d24       | 0.64 |
| 10467068 | sphingomyelin synthase 1                                                 | Sgms1         | 0.64 |
| 10492997 | ets variant gene 3                                                       | Etv3          | 0.63 |
| 10467470 | aldehyde dehydrogenase 18 family, member A1                              | Aldh18a1      | 0.63 |
| 10433032 | activating transcription factor 7                                        | Atf7          | 0.63 |
| 10410366 | RIKEN cDNA 3830402I07 gene                                               | 3830402I07Rik | 0.63 |
| 10538142 | GTPase, IMAP family member 5                                             | Gimap5        | 0.63 |
| 10606619 | synaptotagmin-like 4                                                     | Syt14         | 0.63 |
| 10383196 | hypothetical LOC672511                                                   | LOC672511     | 0.63 |
| 10352281 | acyl-Coenzyme A binding domain containing 3                              | Acbd3         | 0.63 |

|          |                                                                                         |                                  |             |
|----------|-----------------------------------------------------------------------------------------|----------------------------------|-------------|
| 10468762 | RIKEN cDNA 4930506M07 gene                                                              | 4930506M07Rik                    | <b>0.63</b> |
| 10560826 | zinc finger protein 109                                                                 | Zfp109                           | <b>0.63</b> |
| 10485674 | RIKEN cDNA 2700007P21 gene                                                              | 2700007P21Rik                    | <b>0.63</b> |
| 10437541 | N-acetylglucosamine-1-phosphodiester alpha-N-acetylglucosaminidase                      | Nagpa                            | <b>0.62</b> |
| 10479010 | sporulation protein, meiosis-specific, SPO11 homolog (S. cerevisiae)                    | Spo11                            | <b>0.62</b> |
| 10466903 | RIKEN cDNA 4430402118 gene                                                              | 4430402118Rik                    | <b>0.61</b> |
| 10401937 | cDNA sequence BC005685                                                                  | BC005685                         | <b>0.61</b> |
| 10450694 | histocompatibility 2, T region locus 17   histocompatibility 2, T region locus 22       | H2-T9   H2-T22   H2-T10   H2-T17 | <b>0.61</b> |
| 10483264 | tetratricopeptide repeat domain 21B                                                     | Ttc21b                           | <b>0.61</b> |
| 10442194 | zinc finger protein 677                                                                 | Zfp677                           | <b>0.61</b> |
| 10453114 | DEAH (Asp-Glu-Ala-Asp/His) box polypeptide 57                                           | Dhx57                            | <b>0.61</b> |
| 10349348 | coiled-coil domain containing 93                                                        | Ccdc93                           | <b>0.61</b> |
| 10443869 | cytochrome P450, family 4, subfamily f, polypeptide 16                                  | Cyp4f16                          | <b>0.61</b> |
| 10599232 | NFKB activating protein                                                                 | Nkap                             | <b>0.61</b> |
| 10367591 | myc target 1                                                                            | Myct1                            | <b>0.61</b> |
| 10581625 | RIKEN cDNA 2400003C14 gene                                                              | 2400003C14Rik                    | <b>0.60</b> |
| 10540408 | inositol 1,4,5-triphosphate receptor 1                                                  | Itpr1                            | <b>0.60</b> |
| 10384092 | NudC domain containing 3                                                                | Nudcd3                           | <b>0.60</b> |
| 10604076 | small nucleolar RNA, H/ACA box 69                                                       | Snora69                          | <b>0.60</b> |
| 10606770 | zinc finger, matrin type 1                                                              | Zmat1                            | <b>0.60</b> |
| 10491136 | TRAF2 and NCK interacting kinase                                                        | Tnik                             | <b>0.60</b> |
| 10464443 | similar to ribosomal protein S25                                                        | LOC100045278                     | <b>0.60</b> |
| 10377569 | fragile X mental retardation, autosomal homolog 2                                       | Fxr2                             | <b>0.60</b> |
| 10515211 | RIKEN cDNA 4930544O15 gene                                                              | 4930544O15Rik                    | <b>0.60</b> |
| 10357833 | ATPase, Ca <sup>++</sup> transporting, plasma membrane 4                                | Atp2b4                           | <b>0.59</b> |
| 10494428 | thioredoxin interacting protein                                                         | Txnip                            | <b>0.59</b> |
| 10371356 | adaptor protein, phosphotyrosine interaction, PH domain and leucine zipper containing 2 | Appl2                            | <b>0.59</b> |
| 10535034 | zinc finger protein 68                                                                  | Zfp68                            | <b>0.59</b> |
| 10428328 | solute carrier family 25, member 32                                                     | Slc25a32                         | <b>0.59</b> |
| 10486564 | tau tubulin kinase 2   congenital dyserythropoietic anemia, type I (human)              | Ttbk2   Cdan1                    | <b>0.59</b> |
| 10473160 | sperm specific antigen 2                                                                | Ssfa2                            | <b>0.59</b> |
| 10497590 | ecotropic viral integration site 1                                                      | Evi1                             | <b>0.59</b> |
| 10557585 | zinc finger protein 553                                                                 | Zfp553                           | <b>0.59</b> |
| 10424050 | estrogen receptor-binding fragment-associated gene 9                                    | Ebag9                            | <b>0.59</b> |
| 10578189 | similar to chromodomain helicase DNA binding protein 6                                  | LOC676031                        | <b>0.58</b> |
| 10346838 | par-3 partitioning defective 3 homolog B (C. elegans)                                   | Pard3b                           | <b>0.58</b> |
| 10371230 | guanine nucleotide binding protein, alpha 11                                            | Gna11                            | <b>0.58</b> |
| 10415021 | abhydrolase domain containing 4                                                         | Abhd4                            | <b>0.58</b> |
| 10538890 | hypothetical protein LOC641050                                                          | LOC641050                        | <b>0.58</b> |
| 10371676 | UTP20, small subunit (SSU) processome component, homolog (yeast)                        | Utp20                            | <b>0.58</b> |
| 10511416 | thymocyte selection-associated high mobility group box                                  | Tox                              | <b>0.58</b> |
| 10381006 | thyroid hormone receptor alpha                                                          | Thra                             | <b>0.58</b> |
| 10364130 | zinc finger protein 280b                                                                | Zfp280b                          | <b>0.58</b> |
| 10393509 | ubiquitin specific peptidase 36                                                         | Usp36                            | <b>0.58</b> |
| 10459962 | ATPase, class II, type 9B                                                               | Atp9b                            | <b>0.58</b> |
| 10362596 | Fyn proto-oncogene                                                                      | Fyn                              | <b>0.58</b> |
| 10476893 | GDNF-inducible zinc finger protein 1                                                    | Gzf1                             | <b>0.57</b> |
| 10436209 | Casitas B-lineage lymphoma b                                                            | Cblb                             | <b>0.57</b> |
| 10467871 | dynamamin binding protein                                                               | Dnmbp                            | <b>0.57</b> |
| 10374706 | pseudouridylyl synthase 10                                                              | Pus10                            | <b>0.57</b> |
| 10373036 | amplified in osteosarcoma                                                               | Os9                              | <b>0.57</b> |
| 10479672 | transcription elongation factor A (SII), 2                                              | Tcea2                            | <b>0.57</b> |
| 10478219 | phospholipase C, gamma 1                                                                | Plcg1                            | <b>0.57</b> |
| 10383993 | coiled-coil domain containing 117                                                       | Ccdc117                          | <b>0.57</b> |
| 10453276 | thyroid adenoma associated                                                              | Thada                            | <b>0.57</b> |

|          |                                                                                                     |                    |      |
|----------|-----------------------------------------------------------------------------------------------------|--------------------|------|
| 10403558 | ERO1-like beta ( <i>S. cerevisiae</i> )                                                             | Ero1lb             | 0.57 |
| 10441919 | RIKEN cDNA 1600012H06 gene                                                                          | 1600012H06Rik      | 0.57 |
| 10370303 | adenosine deaminase, RNA-specific, B1                                                               | Adarb1             | 0.57 |
| 10377889 | misshapen-like kinase 1 (zebrafish)                                                                 | Mink1              | 0.56 |
| 10452633 | TGFB-induced factor homeobox 1                                                                      | Tgif1              | 0.56 |
| 10546855 | SLIT-ROBO Rho GTPase activating protein 3                                                           | Srgap3             | 0.56 |
| 10433735 | ATP-binding cassette, sub-family C (CFTR/MRP), member 1                                             | Abcc1              | 0.56 |
| 10539220 | expressed sequence AW146020                                                                         | AW146020           | 0.56 |
| 10588642 | tumor suppressor candidate 4                                                                        | Tusc4              | 0.56 |
| 10462454 | ubiquitin-like, containing PHD and RING finger domains 2                                            | Uhrf2              | 0.56 |
| 10372385 | zinc finger, DHHC domain containing 17                                                              | Zdhhc17            | 0.56 |
| 10560481 | FBJ osteosarcoma oncogene B                                                                         | Fosb               | 0.56 |
| 10432215 | DEAD (Asp-Glu-Ala-Asp) box polypeptide 23                                                           | Ddx23              | 0.56 |
| 10381860 | methyltransferase like 2                                                                            | Mettl2             | 0.56 |
| 10593526 | ataxia telangiectasia mutated homolog (human)                                                       | Atm                | 0.56 |
| 10396919 | RIKEN cDNA 4933426M11 gene                                                                          | 4933426M11Rik      | 0.56 |
| 10383867 | myotubularin related protein 3                                                                      | Mtmr3              | 0.56 |
| 10516371 | eukaryotic translation initiation factor 2C, 1                                                      | Eif2c1             | 0.56 |
| 10595979 | muscle and microspikes RAS                                                                          | Mras               | 0.56 |
| 10361620 | required for meiotic nuclear division 1 homolog ( <i>S. cerevisiae</i> )   predicted gene, EG433224 | EG433224   Rmnd1   | 0.56 |
| 10505109 | cDNA sequence BC026590                                                                              | BC026590           | 0.56 |
| 10584124 | Rho GTPase-activating protein                                                                       | Grit               | 0.56 |
| 10585988 | myosin IXa                                                                                          | Myo9a              | 0.55 |
| 10360563 | SET and MYND domain containing 3                                                                    | Smyd3              | 0.55 |
| 10567702 | Rho GTPase activating protein 17                                                                    | Arhgap17           | 0.55 |
| 10581073 | dynein, cytoplasmic 1 light intermediate chain 2                                                    | Dync1li2           | 0.55 |
| 10426368 | leucine-rich repeat kinase 2                                                                        | Lrrk2              | 0.55 |
| 10590962 | RIKEN cDNA 1700012B09 gene                                                                          | 1700012B09Rik      | 0.55 |
| 10577824 | leucine zipper-EF-hand containing transmembrane protein 2                                           | Letm2              | 0.55 |
| 10504518 | polymerase (RNA) I polypeptide E                                                                    | Polr1e             | 0.55 |
| 10359303 | RIKEN cDNA 4930562F07 gene                                                                          | 4930562F07Rik      | 0.55 |
| 10523974 | predicted gene, ENSMUSG00000072769                                                                  | ENSMUSG00000072769 | 0.54 |
| 10505044 | fukutin                                                                                             | Fktn               | 0.54 |
| 10407392 | cDNA sequence BC016423                                                                              | BC016423           | 0.54 |
| 10479887 | Sec61, alpha subunit 2 ( <i>S. cerevisiae</i> )                                                     | Sec61a2            | 0.54 |
| 10541785 | inhibitor of growth family, member 4   proacrosin binding protein                                   | Acrbp   Ing4       | 0.54 |
| 10496023 | caspase 6                                                                                           | Casp6              | 0.54 |
| 10526133 | RAB guanine nucleotide exchange factor (GEF) 1                                                      | Rabgef1            | 0.54 |
| 10518857 | zinc finger and BTB domain containing 48                                                            | Zbtb48             | 0.54 |
| 10459837 | RIKEN cDNA 8030462N17 gene                                                                          | 8030462N17Rik      | 0.54 |
| 10578521 | sorting nexin 25                                                                                    | Snx25              | 0.54 |
| 10405918 | regulator of sex limited protein 1                                                                  | Rsl1               | 0.54 |
| 10471978 | enhancer of polycomb homolog 2 ( <i>Drosophila</i> )                                                | Epc2               | 0.54 |
| 10478698 | eyes absent 2 homolog ( <i>Drosophila</i> )                                                         | Eya2               | 0.54 |
| 10496539 | guanylate binding protein 5                                                                         | Gbp5               | 0.54 |
| 10588283 | RAB6B, member RAS oncogene family                                                                   | Rab6b              | 0.54 |
| 10600372 | RIKEN cDNA B230340J04 gene                                                                          | B230340J04Rik      | 0.54 |
| 10353549 | RIKEN cDNA 4921533L14 gene                                                                          | 4921533L14Rik      | 0.54 |
| 10498064 | SET domain containing (lysine methyltransferase) 7                                                  | Setd7              | 0.53 |
| 10347232 | X-ray repair complementing defective repair in Chinese hamster cells 5                              | Xrcc5              | 0.53 |
| 10389143 | schlafen 8                                                                                          | Slnf8              | 0.53 |
| 10378855 | slingshot homolog 2 ( <i>Drosophila</i> )                                                           | Ssh2               | 0.53 |
| 10411156 | secretory carrier membrane protein 1                                                                | Scamp1             | 0.53 |
| 10404941 | amine oxidase, flavin containing 1                                                                  | Aof1               | 0.53 |
| 10369290 | DNA-damage-inducible transcript 4                                                                   | Ddit4              | 0.53 |
| 10557575 | myosin light chain, phosphorylatable, fast skeletal muscle                                          | Mylpf              | 0.53 |



|          |                                                                                            |                                                  |             |
|----------|--------------------------------------------------------------------------------------------|--------------------------------------------------|-------------|
| 10519472 | mitochondrial transcription termination factor   predicted gene, ENSMUSG00000053178        | Mterf   ENSMUSG00000053178                       | <b>0.53</b> |
| 10442199 | zinc finger protein 54                                                                     | Zfp54                                            | <b>0.53</b> |
| 10433639 | MKL/myocardin-like 2                                                                       | Mkl2                                             | <b>0.53</b> |
| 10475378 | cancer susceptibility candidate 4                                                          | Casc4                                            | <b>0.52</b> |
| 10408475 | E2F transcription factor 3                                                                 | E2f3                                             | <b>0.52</b> |
| 10505996 | FGGY carbohydrate kinase domain containing                                                 | Fggy                                             | <b>0.52</b> |
| 10485241 | 1-aminocyclopropane-1-carboxylate synthase homolog (Arabidopsis)(non-functional)           | Accs                                             | <b>0.52</b> |
| 10494445 | Lix1-like                                                                                  | Lix1l                                            | <b>0.52</b> |
| 10480064 | F-box protein 18                                                                           | Fbxo18                                           | <b>0.52</b> |
| 10386604 | serine hydroxymethyltransferase 1 (soluble)                                                | Shmt1                                            | <b>0.52</b> |
| 10405094 | isoleucine-tRNA synthetase                                                                 | Iars                                             | <b>0.52</b> |
| 10599200 | progesterone receptor membrane component 1                                                 | Pgrmc1                                           | <b>0.52</b> |
| 10391732 | G patch domain containing 8   predicted gene, ENSMUSG00000075516                           | Gpatch8   ENSMUSG00000075516                     | <b>0.52</b> |
| 10549899 | zinc finger protein 418                                                                    | Zfp418                                           | <b>0.52</b> |
| 10477543 | core-binding factor, runt domain, alpha subunit 2, translocated to, 2 (human)              | Cbfa2t2                                          | <b>0.52</b> |
| 10595529 | RIKEN cDNA 4922501C03 gene                                                                 | 4922501C03Rik                                    | <b>0.51</b> |
| 10562439 | G patch domain containing 1                                                                | Gpatch1                                          | <b>0.51</b> |
| 10514520 | cytochrome P450, family 2, subfamily j, polypeptide 9                                      | Cyp2j9                                           | <b>0.51</b> |
| 10489620 | nuclear receptor coactivator 5                                                             | Ncoa5                                            | <b>0.51</b> |
| 10347741 | monoacylglycerol O-acyltransferase 1                                                       | Mogat1                                           | <b>0.51</b> |
| 10461782 | required for meiotic nuclear division 1 homolog (S. cerevisiae)   predicted gene, EG433224 | Rmnd1   EG433224                                 | <b>0.51</b> |
| 10516678 | karyopherin (importin) alpha 6                                                             | Kpna6                                            | <b>0.51</b> |
| 10536061 | RIKEN cDNA 2610021A01 gene                                                                 | 2610021A01Rik                                    | <b>0.51</b> |
| 10393177 | acyl-Coenzyme A oxidase 1, palmitoyl                                                       | Acox1                                            | <b>0.51</b> |
| 10515574 | ST3 beta-galactoside alpha-2,3-sialyltransferase 3                                         | St3gal3                                          | <b>0.50</b> |
| 10415911 | kinesin family member 13B                                                                  | Kif13b                                           | <b>0.50</b> |
| 10596269 | DnaJ (Hsp40) homolog, subfamily C, member 13                                               | Dnajc13                                          | <b>0.50</b> |
| 10361200 | expressed sequence AA408296                                                                | AA408296                                         | <b>0.50</b> |
| 10562897 | zinc finger protein 473                                                                    | Zfp473                                           | <b>0.50</b> |
| 10504106 | interleukin 11 receptor, alpha chain 1   interleukin 11 receptor, alpha chain 2            | Il11ra1   RP23-388P16.3   Il11ra2   LOC100038993 | <b>0.50</b> |
| 10449225 | 2-4-dienoyl-Coenzyme A reductase 2, peroxisomal                                            | Decr2                                            | <b>0.50</b> |
| 10545780 | exocyst complex component 6B                                                               | Exoc6b                                           | <b>0.50</b> |
| 10349453 | RAB3 GTPase activating protein subunit 1                                                   | Rab3gap1                                         | <b>0.49</b> |
| 10572989 | solute carrier family 10 (sodium/bile acid cotransporter family), member 7                 | Slc10a7                                          | <b>0.49</b> |
| 10439895 | activated leukocyte cell adhesion molecule                                                 | Alcam                                            | <b>0.49</b> |
| 10439960 | centrosomal protein 97                                                                     | Cep97                                            | <b>0.49</b> |
| 10417912 | ubiquitin specific peptidase 54                                                            | Usp54                                            | <b>0.49</b> |
| 10554269 | abhydrolase domain containing 2                                                            | Abhd2                                            | <b>0.49</b> |
| 10397866 | golgi autoantigen, golgin subfamily a, 5                                                   | Golga5                                           | <b>0.49</b> |
| 10456439 | centrosomal protein 192                                                                    | Cep192                                           | <b>0.49</b> |
| 10442211 | zinc finger protein 53                                                                     | Zfp53                                            | <b>0.49</b> |
| 10418766 | ankyrin repeat domain 28                                                                   | Ankrd28                                          | <b>0.49</b> |
| 10495259 | guanine nucleotide binding protein, alpha transducing 2                                    | Gnat2                                            | <b>0.49</b> |
| 10551487 | similar to EID-2-like inhibitor of differentiation-3                                       | LOC434156                                        | <b>0.49</b> |
| 10562670 | zinc finger protein 715                                                                    | Zfp715                                           | <b>0.49</b> |
| 10599435 | oculocerebrorenal syndrome of Lowe                                                         | Ocrl                                             | <b>0.49</b> |
| 10476969 | brain glycogen phosphorylase                                                               | Pygb                                             | <b>0.48</b> |
| 10546402 | zinc finger, FYVE domain containing 20                                                     | Zfyve20                                          | <b>0.48</b> |
| 10537834 | Rho guanine nucleotide exchange factor (GEF) 5                                             | Arhgef5                                          | <b>0.48</b> |
| 10542395 | activating transcription factor 7 interacting protein                                      | Atf7ip                                           | <b>0.48</b> |
| 10453026 | protein kinase D3                                                                          | Prkd3                                            | <b>0.48</b> |
| 10603431 | suppressor of variegation 3-9 homolog 1 (Drosophila)                                       | Suv39h1                                          | <b>0.48</b> |
| 10397666 | zinc finger CCCH type containing 14                                                        | Zc3h14                                           | <b>0.48</b> |
| 10596119 | centrosomal protein 63                                                                     | Cep63                                            | <b>0.48</b> |



|          |                                                                 |               |      |
|----------|-----------------------------------------------------------------|---------------|------|
| 10600169 | biglycan                                                        | Bgn           | 0.48 |
| 10428827 | transmembrane protein 65                                        | Tmem65        | 0.48 |
| 10402020 | echinoderm microtubule associated protein like 5                | Em15          | 0.48 |
| 10532630 | adrenergic receptor kinase, beta 2                              | Adrbk2        | 0.48 |
| 10590343 | trafficking protein, kinesin binding 1                          | Trak1         | 0.47 |
| 10554419 | vacuolar protein sorting 33B (yeast)                            | Vps33b        | 0.47 |
| 10544563 | zinc finger protein 467                                         | Zfp467        | 0.47 |
| 10381218 | hydroxysteroid (17-beta) dehydrogenase 1                        | Hsd17b1       | 0.47 |
| 10510604 | DnaJ (Hsp40) homolog, subfamily C, member 11                    | Dnajc11       | 0.47 |
| 10512949 | ATP-binding cassette, sub-family A (ABC1), member 1             | Abca1         | 0.47 |
| 10401852 | RIKEN cDNA 4930534B04 gene                                      | 4930534B04Rik | 0.47 |
| 10350977 | RIKEN cDNA 4930523C07 gene                                      | 4930523C07Rik | 0.47 |
| 10507484 | prion protein interacting protein 1                             | Prnpip1       | 0.47 |
| 10430574 | RIKEN cDNA 4933432B09 gene                                      | 4933432B09Rik | 0.47 |
| 10506058 | InaD-like (Drosophila)                                          | Inadl         | 0.47 |
| 10487109 | centrosomal protein 152                                         | Cep152        | 0.47 |
| 10501762 | sorting nexin 7                                                 | Snx7          | 0.47 |
| 10357604 | inhibitor of kappaB kinase epsilon                              | Ikbke         | 0.46 |
| 10564839 | adaptor-related protein complex 3, sigma 2 subunit              | Ap3s2         | 0.46 |
| 10577838 | DDHD domain containing 2                                        | Ddhd2         | 0.46 |
| 10506274 | DnaJ (Hsp40) homolog, subfamily C, member 6                     | Dnajc6        | 0.46 |
| 10357220 | transmembrane protein 177                                       | Tmem177       | 0.46 |
| 10589587 | SET domain containing 2                                         | Setd2         | 0.46 |
| 10360506 | thymoma viral proto-oncogene 3                                  | Akt3          | 0.46 |
| 10361956 | microtubule-associated protein 7                                | Mtap7         | 0.46 |
| 10469720 | acyl-Coenzyme A binding domain containing 5                     | Acbd5         | 0.46 |
| 10438639 | diacylglycerol kinase, gamma                                    | Dgkg          | 0.46 |
| 10452935 | HEAT repeat containing 5B                                       | Heatr5b       | 0.46 |
| 10500103 | GA repeat binding protein, beta 2                               | Gabpb2        | 0.45 |
| 10554629 | elongation factor Tu GTP binding domain containing 1            | Eftud1        | 0.45 |
| 10479077 | vesicle-associated membrane protein, associated protein B and C | Vapb          | 0.45 |
| 10432986 | achalasia, adrenocortical insufficiency, alacrimia              | Aaas          | 0.45 |
| 10534966 | zinc finger protein 113                                         | Zfp113        | 0.45 |
| 10457606 | potassium channel tetramerisation domain containing 1           | Kctd1         | 0.45 |
| 10598164 | RIKEN cDNA 0610010K06 gene                                      | 0610010K06Rik | 0.45 |
| 10491617 | RIKEN cDNA 4932438A13 gene                                      | 4932438A13Rik | 0.45 |
| 10531752 | helicase, mus308-like (Drosophila)                              | Hel308        | 0.45 |
| 10435802 | RIKEN cDNA 2610015P09 gene                                      | 2610015P09Rik | 0.44 |
| 10416522 | TSC22 domain family, member 1                                   | Tsc22d1       | 0.44 |
| 10466682 | structural maintenance of chromosomes 5                         | Smc5          | 0.44 |
| 10506134 | autophagy-related 4C (yeast)                                    | Atg4c         | 0.44 |
| 10481577 | uridine-cytidine kinase 1                                       | Uck1          | 0.44 |
| 10590004 | golgi autoantigen, golgin subfamily a, 4                        | Golga4        | 0.44 |
| 10502042 | alpha-kinase 1                                                  | Alpk1         | 0.44 |
| 10446027 | chromatin assembly factor 1, subunit A (p150)                   | Chaf1a        | 0.44 |
| 10450372 | heat shock protein 1-like                                       | Hspa1l        | 0.44 |
| 10463751 | programmed cell death 11                                        | Pdcd11        | 0.44 |
| 10522627 | centrosomal protein 135                                         | Cep135        | 0.44 |
| 10401267 | WD repeat domain 22                                             | Wdr22         | 0.44 |
| 10416753 | progesterone immunomodulatory binding factor 1                  | Pibf1         | 0.44 |
| 10475437 | sorbitol dehydrogenase                                          | Sord          | 0.44 |
| 10509930 | F-box protein 42                                                | Fbxo42        | 0.43 |
| 10357164 | erythrocyte protein band 4.1-like 5                             | Epb4.1l5      | 0.43 |
| 10420694 | integrator complex subunit 6                                    | Ints6         | 0.43 |
| 10574789 | RIKEN cDNA 2310066E14 gene                                      | 2310066E14Rik | 0.43 |
| 10519857 | hepatocyte growth factor                                        | Hgf           | 0.43 |
| 10579079 | RIKEN cDNA 1200003I07 gene                                      | 1200003I07Rik | 0.42 |
| 10542677 | ethanolamine kinase 1                                           | Etnk1         | 0.42 |
| 10460221 | choline kinase alpha                                            | Chka          | 0.42 |
| 10558961 | tetraspanin 4                                                   | Tspan4        | 0.42 |

|          |                                                                                                                               |                            |       |
|----------|-------------------------------------------------------------------------------------------------------------------------------|----------------------------|-------|
| 10377984 | zinc finger protein 3                                                                                                         | Zfp3                       | 0.42  |
| 10551061 | zinc finger protein 574                                                                                                       | Zfp574                     | 0.42  |
| 10520405 | gene model 1040, (NCBI)                                                                                                       | Gm1040                     | 0.42  |
| 10477649 | myosin, heavy chain 7B, cardiac muscle, beta   acyl-CoA synthetase short-chain family member 2                                | Acss2   Myh7b              | 0.42  |
| 10507334 | RIKEN cDNA 0610037D15 gene                                                                                                    | 0610037D15Rik              | 0.41  |
| 10537410 | thromboxane A synthase 1, platelet                                                                                            | Tbxas1                     | 0.41  |
| 10488291 | retinoblastoma binding protein 9                                                                                              | Rbbp9                      | 0.41  |
| 10549655 | EPS8-like 1                                                                                                                   | Eps8l1                     | 0.41  |
| 10458424 | TAF7 RNA polymerase II, TATA box binding protein (TBP)-associated factor                                                      | Taf7                       | 0.41  |
| 10392910 | RIKEN cDNA C630004H02 gene                                                                                                    | C630004H02Rik              | 0.41  |
| 10483381 | serine/threonine kinase 39, STE20/SPS1 homolog (yeast)                                                                        | Stk39                      | 0.41  |
| 10595452 | ubiquitin-conjugating enzyme E2C binding protein                                                                              | Ube2cbp                    | 0.41  |
| 10466317 | zinc finger protein 91, ciliary neurotrophic factor transcription unit   zinc finger protein 91   ciliary neurotrophic factor | Zfp91-cntf   Cntf   Zfp91  | 0.41  |
| 10537227 | transmembrane protein 140                                                                                                     | Tmem140                    | 0.40  |
| 10372069 | suppressor of cytokine signaling 2                                                                                            | Socs2                      | 0.40  |
| 10540923 | makorin, ring finger protein, 2                                                                                               | Mkrn2                      | 0.40  |
| 10505674 | centlein, centrosomal protein                                                                                                 | Cntlnc                     | 0.40  |
| 10397377 | tubulin tyrosine ligase-like family, member 5                                                                                 | Ttl5                       | 0.40  |
| 10376021 | septin 8                                                                                                                      | 41160                      | 0.40  |
| 10463404 | RIKEN cDNA 6030443O07 gene                                                                                                    | 6030443O07Rik              | 0.40  |
| 10513061 | catenin (cadherin associated protein), alpha-like 1                                                                           | Ctnna1                     | 0.40  |
| 10544133 | poly (ADP-ribose) polymerase family, member 12                                                                                | Parp12                     | 0.40  |
| 10441342 | RIKEN cDNA 1810020G14 gene   synaptojanin 2 binding protein                                                                   | 1810020G14Rik   Synj2bp    | 0.40  |
| 10506397 | mesoderm induction early response 1 homolog (Xenopus laevis)                                                                  | Mier1                      | 0.40  |
| 10542522 | pleckstrin homology domain containing, family A member 5                                                                      | Plekha5                    | 0.39  |
| 10508249 | predicted gene, OTTMUSG00000009332   zinc finger, MYM-type 6                                                                  | Zmym6   OTTMUSG00000009332 | 0.39  |
| 10394471 | syndecan 1                                                                                                                    | Sdc1                       | 0.39  |
| 10468992 | FERM domain containing 4A                                                                                                     | Frmd4a                     | 0.39  |
| 10507299 | GC-rich promoter binding protein 1-like 1                                                                                     | Gbp1l1                     | 0.38  |
| 10381419 | neighbor of Brca1 gene 1                                                                                                      | Nbr1                       | 0.38  |
| 10416588 | RIKEN cDNA 1300010F03 gene                                                                                                    | 1300010F03Rik              | 0.38  |
| 10454298 | zinc finger protein 397                                                                                                       | Zfp397                     | 0.38  |
| 10499981 | ornithine decarboxylase antizyme 3                                                                                            | Oaz3                       | 0.38  |
| 10349249 | CLIP associating protein 1                                                                                                    | Clasp1                     | 0.38  |
| 10373340 | RNA binding motif, single stranded interacting protein 2                                                                      | Rbms2                      | 0.37  |
| 10595805 | RAS p21 protein activator 2                                                                                                   | Rasa2                      | 0.37  |
| 10493394 | secretory carrier membrane protein 3   CDC-like kinase 2                                                                      | Scamp3   Clk2              | 0.37  |
| 10442986 | Luc7 homolog (S. cerevisiae)-like                                                                                             | Luc7l                      | 0.36  |
| 10344821 | centrosome and spindle pole associated protein 1                                                                              | Csp1                       | 0.36  |
| 10542241 | taste receptor, type 2, member 120                                                                                            | Tas2r120                   | -0.53 |
| 10412211 | granzyme A                                                                                                                    | Gzma                       | -0.56 |
| 10562093 | RIKEN cDNA 4930479M11 gene                                                                                                    | 4930479M11Rik              | -0.61 |
| 10562152 | myelin-associated glycoprotein                                                                                                | Mag                        | -0.62 |
| 10605493 | proline rich Gla (G-carboxyglutamic acid) 1                                                                                   | Prrg1                      | -0.65 |
| 10412911 | farnesyl diphosphate farnesyl transferase 1                                                                                   | Fdft1                      | -0.65 |
| 10471761 | olfactory receptor 352                                                                                                        | Olf352                     | -0.66 |
| 10537506 | olfactory receptor 460                                                                                                        | Olf460                     | -0.67 |
| 10528615 | predicted gene, ENSMUSG00000073129                                                                                            | ENSMUSG00000073129         | -0.68 |
| 10580635 | carboxylesterase 3                                                                                                            | Ces3                       | -0.72 |
| 10428955 | gasdermin C2                                                                                                                  | Gsdmc2                     | -0.72 |
| 10400607 | MAM domain containing glycosylphosphatidylinositol anchor 2                                                                   | Mdga2                      | -0.74 |

|          |                                                                                       |                                                                                                                       |       |
|----------|---------------------------------------------------------------------------------------|-----------------------------------------------------------------------------------------------------------------------|-------|
| 10500982 | RIKEN cDNA I830077J02 gene                                                            | I830077J02Rik                                                                                                         | -0.74 |
| 10606355 | cysteinyl leukotriene receptor 1                                                      | Cysl1r1                                                                                                               | -0.74 |
| 10560791 | predicted gene, EG628664   predicted gene, EG545926                                   | EG381936   EG545926   100043625   EG620736   ENSMUSG00000074321   EG628664   EG545929                                 | -0.75 |
| 10560764 | predicted gene, EG628664   predicted gene, ENSMUSG00000074321                         | EG381936   EG620736   ENSMUSG00000074321   EG628664   EG545929                                                        | -0.75 |
| 10560777 | predicted gene, EG628664   predicted gene, EG545926                                   | EG381936   EG545926   100043625   EG620736   ENSMUSG00000074321   EG628664   EG545929                                 | -0.75 |
| 10477644 | transformation related protein 53 inducible nuclear protein 2                         | Trp53inp2                                                                                                             | -0.75 |
| 10550772 | predicted gene, EG628475   predicted gene, EG628664                                   | EG381936   EG628475   EG545926   100043625   EG620736   ENSMUSG00000074321   EG628664   EG545929   ENSMUSG00000074296 | -0.75 |
| 10560807 | predicted gene, EG628664   predicted gene, EG545926                                   | EG381936   EG545926   100043625   EG620736   ENSMUSG00000074321   EG628664   EG545929                                 | -0.75 |
| 10566696 | olfactory receptor 509                                                                | Olf1r509                                                                                                              | -0.76 |
| 10423002 | UDP glycosyltransferases 3 family, polypeptide A1                                     | Ugt3a1                                                                                                                | -0.76 |
| 10429100 | leucine rich repeat containing 6 (testis)                                             | Lrrc6                                                                                                                 | -0.76 |
| 10603533 | synovial sarcoma, X member B, breakpoint 3                                            | Ssxb3                                                                                                                 | -0.79 |
| 10394060 | secreted and transmembrane 1B                                                         | Sectm1b                                                                                                               | -0.82 |
| 10402347 | interferon, alpha-inducible protein 27                                                | Ifi27                                                                                                                 | -0.82 |
| 10564013 | expressed sequence AF357427                                                           | AF357427                                                                                                              | -0.82 |
| 10564017 | expressed sequence AF357427                                                           | AF357427                                                                                                              | -0.82 |
| 10406928 | CD180 antigen                                                                         | Cd180                                                                                                                 | -0.83 |
| 10489451 | seminal vesicle secretory protein 2                                                   | Svs2                                                                                                                  | -0.85 |
| 10550762 | predicted gene, EG628475   predicted gene, EG628664                                   | EG381936   EG628475   EG545926   100043625   EG620736   ENSMUSG00000074321   EG628664   EG545929   ENSMUSG00000074296 | -0.86 |
| 10542255 | taste receptor, type 2, member 113                                                    | Tas2r113                                                                                                              | -0.89 |
| 10400948 | Six6 opposite strand transcript 1                                                     | Six6os1                                                                                                               | -0.89 |
| 10360338 | Fc receptor, IgE, high affinity I, alpha polypeptide                                  | Fc1r1a                                                                                                                | -0.93 |
| 10552294 | RIKEN cDNA 4930433111 gene                                                            | 4930433111Rik                                                                                                         | -0.95 |
| 10560760 | predicted gene, EG628664   predicted gene, EG545926                                   | EG381936   EG545926   100043625   EG620736   ENSMUSG00000074321   EG628664   EG545929                                 | -0.96 |
| 10560773 | predicted gene, EG628664   predicted gene, EG545926                                   | EG381936   EG545926   100043625   EG620736   ENSMUSG00000074321   EG628664   EG545929                                 | -0.96 |
| 10560803 | predicted gene, EG545929                                                              | EG545929                                                                                                              | -0.96 |
| 10598093 | RIKEN cDNA 9930022N03 gene                                                            | 9930022N03Rik                                                                                                         | -0.99 |
| 10493820 | S100 calcium binding protein A6 (calcyclin)                                           | S100a6                                                                                                                | -1.00 |
| 10597098 | cathelicidin antimicrobial peptide                                                    | Camp                                                                                                                  | -1.02 |
| 10583100 | matrix metalloproteinase 8                                                            | Mmp8                                                                                                                  | -1.04 |
| 10451646 | RIKEN cDNA A530064D06 gene                                                            | A530064D06Rik                                                                                                         | -1.05 |
| 10347925 | component of Sp100-rs   predicted gene, EG665378                                      | Csprs   EG665378                                                                                                      | -1.06 |
| 10432774 | keratin 6B                                                                            | Krt6b                                                                                                                 | -1.07 |
| 10475517 | expressed sequence AA467197                                                           | AA467197                                                                                                              | -1.07 |
| 10550994 | carcinoembryonic antigen-related cell adhesion molecule 10                            | Ceacam10                                                                                                              | -1.08 |
| 10473089 | deafness, autosomal recessive 59 (human)                                              | Dfnb59                                                                                                                | -1.09 |
| 10347915 | component of Sp100-rs                                                                 | Csprs                                                                                                                 | -1.09 |
| 10528191 | spermatogenesis associated glutamate (E)-rich protein 4e   RIKEN cDNA 4930572O03 gene | ENSMUSG00000033219   Speer4d   Speer4e   4930572O03Rik                                                                | -1.11 |
| 10448124 | formyl peptide receptor 1                                                             | Fpr1                                                                                                                  | -1.11 |
| 10386185 | olfactory receptor 325   olfactory receptor 330   olfactory                           | Olf1r325   Olf1r331   Olf1r329   Olf1r328                                                                             | -1.12 |

|          |                                                                                                                     |                                                                                                         |              |
|----------|---------------------------------------------------------------------------------------------------------------------|---------------------------------------------------------------------------------------------------------|--------------|
|          | receptor 329   olfactory receptor 331   olfactory receptor 328                                                      | Olfr330                                                                                                 |              |
| 10497356 | signal-regulatory protein beta 1   predicted gene, 668101                                                           | 668101   Sirpb1                                                                                         | <b>-1.13</b> |
| 10563937 | expressed sequence AF357427                                                                                         | AF357427                                                                                                | <b>-1.13</b> |
| 10563947 | expressed sequence AF357427                                                                                         | AF357427                                                                                                | <b>-1.13</b> |
| 10563951 | expressed sequence AF357427                                                                                         | AF357427                                                                                                | <b>-1.13</b> |
| 10563953 | expressed sequence AF357427                                                                                         | AF357427                                                                                                | <b>-1.13</b> |
| 10563957 | expressed sequence AF357427                                                                                         | AF357427                                                                                                | <b>-1.13</b> |
| 10563995 | expressed sequence AF357427                                                                                         | AF357427                                                                                                | <b>-1.13</b> |
| 10563997 | expressed sequence AF357427                                                                                         | AF357427                                                                                                | <b>-1.13</b> |
| 10563999 | expressed sequence AF357427                                                                                         | AF357427                                                                                                | <b>-1.13</b> |
| 10564001 | expressed sequence AF357427                                                                                         | AF357427                                                                                                | <b>-1.13</b> |
| 10564003 | expressed sequence AF357427                                                                                         | AF357427                                                                                                | <b>-1.13</b> |
| 10564007 | expressed sequence AF357427                                                                                         | AF357427                                                                                                | <b>-1.13</b> |
| 10564029 | expressed sequence AF357427                                                                                         | AF357427                                                                                                | <b>-1.13</b> |
| 10564031 | expressed sequence AF357427                                                                                         | AF357427                                                                                                | <b>-1.13</b> |
| 10564065 | predicted gene, 100040985                                                                                           | 100040985                                                                                               | <b>-1.13</b> |
| 10584458 | olfactory receptor 920                                                                                              | Olfr920                                                                                                 | <b>-1.16</b> |
| 10528799 | spermatogenesis associated glutamate (E)-rich protein 4a                                                            | Speer4a                                                                                                 | <b>-1.16</b> |
| 10363070 | glycoprotein 49 A   leukocyte immunoglobulin-like receptor, subfamily B, member 4                                   | Gp49a   Lilrb4                                                                                          | <b>-1.16</b> |
| 10473604 | olfactory receptor 46                                                                                               | Olfr46                                                                                                  | <b>-1.18</b> |
| 10528821 | spermatogenesis associated glutamate (E)-rich protein 4b   spermatogenesis associated glutamate (E)-rich protein 4a | Speer4a   5031410I06Rik   Speer4b                                                                       | <b>-1.19</b> |
| 10490244 | predicted gene, 100039109                                                                                           | 100039109                                                                                               | <b>-1.20</b> |
| 10490271 | predicted gene, 100039109                                                                                           | 100039109                                                                                               | <b>-1.20</b> |
| 10564011 | expressed sequence AF357427                                                                                         | AF357427                                                                                                | <b>-1.21</b> |
| 10498367 | purinergic receptor P2Y, G-protein coupled 13                                                                       | P2ry13                                                                                                  | <b>-1.22</b> |
| 10473483 | olfactory receptor 1029                                                                                             | Olfr1029                                                                                                | <b>-1.25</b> |
| 10509002 | Rh blood group, D antigen                                                                                           | Rhd                                                                                                     | <b>-1.26</b> |
| 10440170 | olfactory receptor 198                                                                                              | Olfr198                                                                                                 | <b>-1.26</b> |
| 10435748 | RIKEN cDNA D930030D11 gene                                                                                          | D930030D11Rik                                                                                           | <b>-1.27</b> |
| 10522573 | predicted gene, 100041354   RIKEN cDNA E330014E10 gene                                                              | E330014E10Rik   D5Ert577e   100041354   AU018829                                                        | <b>-1.28</b> |
| 10536021 | predicted gene, 100041354   RIKEN cDNA E330014E10 gene                                                              | E330014E10Rik   D5Ert577e   100041354   AU018829                                                        | <b>-1.28</b> |
| 10359419 | RIKEN cDNA 4930469G21 gene                                                                                          | 4930469G21Rik                                                                                           | <b>-1.29</b> |
| 10420254 | mast cell protease 8                                                                                                | Mcpt8                                                                                                   | <b>-1.30</b> |
| 10424683 | lymphocyte antigen 6 complex, locus G                                                                               | Ly6g                                                                                                    | <b>-1.30</b> |
| 10555781 | olfactory receptor 603   olfactory receptor 604   predicted gene, OTTMUSG00000019046                                | Olfr604   OTTMUSG00000019046   Olfr603                                                                  | <b>-1.30</b> |
| 10569020 | interferon induced transmembrane protein 6                                                                          | Ifitm6                                                                                                  | <b>-1.30</b> |
| 10523341 | predicted gene, 100041354   RIKEN cDNA E330014E10 gene                                                              | LOC100040885   100041179   E330014E10Rik   D5Ert577e   100041354   AU018829   EG665802   100041032      | <b>-1.34</b> |
| 10536037 | predicted gene, 100041354   RIKEN cDNA E330014E10 gene                                                              | E330014E10Rik   D5Ert577e   100041354   AU018829                                                        | <b>-1.34</b> |
| 10536048 | predicted gene, 100041354   RIKEN cDNA E330014E10 gene                                                              | E330014E10Rik   D5Ert577e   100041354   AU018829                                                        | <b>-1.34</b> |
| 10523312 | predicted gene, 100041354   RIKEN cDNA E330014E10 gene                                                              | E330014E10Rik   D5Ert577e   100041354   AU018829                                                        | <b>-1.34</b> |
| 10528815 | spermatogenesis associated glutamate (E)-rich protein 4e                                                            | Speer4a   Speer4e   4930572O03Rik   5031410I06Rik   Speer4b                                             | <b>-1.34</b> |
| 10484510 | olfactory receptor 988                                                                                              | Olfr988                                                                                                 | <b>-1.34</b> |
| 10522585 | predicted gene, EG622744   predicted gene, 624421                                                                   | LOC624931   624698   EG666209   EG620551   EG620639   LOC625240   665551   EG665031   624421   EG622744 | <b>-1.35</b> |

|          |                                                                                                 |                                                                                                                            |       |
|----------|-------------------------------------------------------------------------------------------------|----------------------------------------------------------------------------------------------------------------------------|-------|
| 10414250 | RIKEN cDNA 1700049E17 gene, gene 1   predicted gene 73415   RIKEN cDNA 4930503E14 gene          | 1700049E17Rik1   73415   4930503E14Rik                                                                                     | -1.37 |
| 10542223 | RIKEN cDNA 5430401F13 gene                                                                      | 5430401F13Rik                                                                                                              | -1.37 |
| 10419446 | olfactory receptor 731                                                                          | Olf731                                                                                                                     | -1.37 |
| 10523350 | predicted gene, 100041354   RIKEN cDNA E330014E10 gene                                          | LOC100040885   100041179   E330014E10Rik   D5Ertd577e   100041354   AU018829   EG665802   100041032                        | -1.38 |
| 10528804 | RIKEN cDNA 4930572O03 gene   spermatogenesis associated glutamate (E)-rich protein 4a           | Speer4a   4930572O03Rik   5031410106Rik                                                                                    | -1.38 |
| 10461820 | olfactory receptor 1489                                                                         | Olf1489                                                                                                                    | -1.39 |
| 10349968 | chitinase 3-like 1                                                                              | Chi3l1                                                                                                                     | -1.39 |
| 10419111 | predicted gene, ENSMUSG00000072602   RIKEN cDNA 1700001F09 gene                                 | 1700001F09Rik   ENSMUSG00000072602                                                                                         | -1.39 |
| 10566249 | olfactory receptor 68                                                                           | Olf68                                                                                                                      | -1.40 |
| 10522562 | expressed sequence C87414   RIKEN cDNA E330014E10 gene                                          | AA792892   C87414   E330014E10Rik                                                                                          | -1.40 |
| 10451763 | special AT-rich sequence binding protein 1                                                      | Satb1                                                                                                                      | -1.41 |
| 10530722 | predicted gene, EG665020   RIKEN cDNA A430089I19 gene                                           | ENSMUSG00000072817   EG545763   EG666203   A430089I19Rik   EG664941   LOC665755   EG665020   666187   BC061212   100041115 | -1.41 |
| 10523320 | expressed sequence C87414   RIKEN cDNA E330014E10 gene                                          | AA792892   C87414   E330014E10Rik                                                                                          | -1.43 |
| 10566170 | olfactory receptor 559                                                                          | Olf559                                                                                                                     | -1.43 |
| 10545096 | RIKEN cDNA 2410003J06 gene   predicted gene, OTTMUSG00000018935                                 | 2410003J06Rik   OTTMUSG00000018935                                                                                         | -1.43 |
| 10573054 | glycophorin A                                                                                   | Gypa                                                                                                                       | -1.44 |
| 10546233 | vomer nasal 1 receptor, A5                                                                      | V1ra5                                                                                                                      | -1.45 |
| 10407940 | NLR family, apoptosis inhibitory protein 3   T-cell receptor gamma, constant region             | Naip3   Tcrp-V1   Tcrp-C   Tcrp-V2   Tcrp-V3                                                                               | -1.45 |
| 10466622 | predicted gene, ENSMUSG00000074936                                                              | ENSMUSG00000074936                                                                                                         | -1.46 |
| 10531497 | predicted gene, 100041354   RIKEN cDNA E330014E10 gene                                          | E330014E10Rik   D5Ertd577e   100041354   AU018829                                                                          | -1.47 |
| 10545217 | similar to [Human Ig rearranged gamma chain mRNA, V-J-C region and complete cds.], gene product | LOC100046973                                                                                                               | -1.48 |
| 10445192 | Rhesus blood group-associated A glycoprotein                                                    | Rhag                                                                                                                       | -1.48 |
| 10366446 | tetraspanin 8                                                                                   | Tspan8                                                                                                                     | -1.51 |
| 10442292 | vomer nasal 2, receptor 113                                                                     | Vmn2r113                                                                                                                   | -1.52 |
| 10484735 | olfactory receptor 1175                                                                         | Olf1175                                                                                                                    | -1.53 |
| 10555899 | olfactory receptor 665                                                                          | Olf665                                                                                                                     | -1.54 |
| 10536147 | expressed sequence AU018829                                                                     | AU018829                                                                                                                   | -1.54 |
| 10522554 | predicted gene, 100041354   RIKEN cDNA E330014E10 gene                                          | E330014E10Rik   D5Ertd577e   100041354   AU018829                                                                          | -1.55 |
| 10522569 | predicted gene, 100041354   RIKEN cDNA E330014E10 gene                                          | E330014E10Rik   D5Ertd577e   100041354   AU018829                                                                          | -1.55 |
| 10367491 | olfactory receptor 784                                                                          | Olf784                                                                                                                     | -1.55 |
| 10522577 | predicted gene, 100041354   RIKEN cDNA E330014E10 gene                                          | LOC100040885   100041179   E330014E10Rik   D5Ertd577e   100041354   AU018829   EG665802   100041032                        | -1.56 |
| 10536159 | expressed sequence AU018829                                                                     | AU018829                                                                                                                   | -1.56 |
| 10427687 | sperm flagellar 2                                                                               | Spf2                                                                                                                       | -1.58 |
| 10450892 | olfactory receptor 113                                                                          | Olf113                                                                                                                     | -1.59 |
| 10473537 | olfactory receptor 1123                                                                         | Olf1123                                                                                                                    | -1.60 |
| 10549990 | vomer nasal 1 receptor, G10-like   vomer nasal 1 receptor, G10                                  | V1rg10   LOC171266                                                                                                         | -1.60 |
| 10522558 | predicted gene, EG622744   predicted gene, 624421                                               | LOC624931   624698   EG666209   EG620551   EG620639   LOC625240   LOC632173   665551   EG665031   624421   EG622744        | -1.62 |



|          |                                                                                         |                                                                                                                                                   |       |
|----------|-----------------------------------------------------------------------------------------|---------------------------------------------------------------------------------------------------------------------------------------------------|-------|
| 10546231 | vomeronasal 1 receptor, A6                                                              | V1ra6                                                                                                                                             | -1.65 |
| 10419162 | RIKEN cDNA 1700024B05 gene   RIKEN cDNA 1700049E17 gene, gene 1                         | 1700049E17Rik1   1700024B05Rik   EG434459   73415   4930503E14Rik                                                                                 | -1.68 |
| 10389654 | eosinophil peroxidase                                                                   | Epx                                                                                                                                               | -1.70 |
| 10522581 | predicted gene, 100041354   RIKEN cDNA E330014E10 gene                                  | LOC100040885   100041179   E330014E10Rik   D5Ertd577e   100041354   AU018829   EG665802   100041032                                               | -1.72 |
| 10536155 | expressed sequence AU018829                                                             | AU018829                                                                                                                                          | -1.72 |
| 10560742 | vomeronasal 1 receptor, D16   vomeronasal 1 receptor, D14                               | V1rd16   V1rd14                                                                                                                                   | -1.73 |
| 10484636 | olfactory receptor 1097                                                                 | Olf1097                                                                                                                                           | -1.76 |
| 10439299 | stefin A3   stefin A1                                                                   | Stfa1   Stfa3                                                                                                                                     | -1.76 |
| 10560795 | vomeronasal 1 receptor, D16   predicted gene, ENSMUSG00000074310                        | Gm1447   V1rd16   EG667240   LOC100043067   EG667292   ENSMUSG00000074310                                                                         | -1.77 |
| 10560789 | vomeronasal 1 receptor, D16                                                             | V1rd16                                                                                                                                            | -1.77 |
| 10397553 | hypothetical protein LOC100039226                                                       | LOC100039226                                                                                                                                      | -1.77 |
| 10414241 | RIKEN cDNA 1700024B05 gene                                                              | 1700024B05Rik                                                                                                                                     | -1.78 |
| 10527878 | vomeronasal 1 receptor, G10-like   vomeronasal 1 receptor, G10                          | V1rg10   LOC171266                                                                                                                                | -1.78 |
| 10373660 | olfactory receptor 818                                                                  | Olf1818                                                                                                                                           | -1.78 |
| 10591129 | FAT tumor suppressor homolog 3 (Drosophila)                                             | Fat3                                                                                                                                              | -1.80 |
| 10414218 | RIKEN cDNA 1700024B05 gene   RIKEN cDNA 1700049E17 gene, gene 1                         | 1700049E17Rik1   1700024B05Rik   73415   4930503E14Rik                                                                                            | -1.80 |
| 10545231 | similar to monoclonal antibody kappa light chain                                        | LOC100047053                                                                                                                                      | -1.80 |
| 10403901 | olfactory receptor 42                                                                   | Olf142                                                                                                                                            | -1.81 |
| 10373634 | olfactory receptor 803                                                                  | Olf1803                                                                                                                                           | -1.82 |
| 10358654 | hemicentin 1                                                                            | Hmcn1                                                                                                                                             | -1.82 |
| 10373647 | olfactory receptor 812                                                                  | Olf1812                                                                                                                                           | -1.83 |
| 10442762 | protease, serine, 34                                                                    | Prss34                                                                                                                                            | -1.84 |
| 10373636 | olfactory receptor 805                                                                  | Olf1805                                                                                                                                           | -1.84 |
| 10551758 | RIKEN cDNA 6330444E15 gene                                                              | 6330444E15Rik                                                                                                                                     | -1.84 |
| 10608480 | similar to spermiogenesis specific transcript on the Y 1                                | LOC100039910   LOC100039147                                                                                                                       | -1.86 |
| 10445178 | olfactory receptor 135   olfactory receptor 134   olfactory receptor 133                | Olf1133   Olf1134   Olf1135                                                                                                                       | -1.86 |
| 10560797 | vomeronasal 1 receptor, D16   predicted gene, EG667464                                  | V1rd16   EG667464   EG620574   ENSMUSG00000074330   V1rd21   EG667240   ENSMUSG00000074310                                                        | -1.88 |
| 10550778 | predicted gene, EG667551   predicted gene, EG667283   predicted gene, 100043559         | EG667283   EG667551   100043559                                                                                                                   | -1.93 |
| 10472400 | sodium channel, voltage-gated, type II, alpha 1                                         | Scn2a1                                                                                                                                            | -1.94 |
| 10560732 | predicted gene, ENSMUSG00000074331   predicted gene, ENSMUSG00000074310                 | Gm1447   EG667472   ENSMUSG00000074330   V1rd21   EG667240   V1rd14   ENSMUSG00000074331   LOC100043067   ENSMUSG00000074310   EG667469           | -1.96 |
| 10560744 | vomeronasal 1 receptor, D16   vomeronasal 1 receptor, D13   vomeronasal 1 receptor, D15 | V1rd13   V1rd16   V1rd15                                                                                                                          | -1.98 |
| 10560780 | predicted gene, EG436135   vomeronasal 1 receptor, D16                                  | Gm1447   V1rd16   EG667599   EG435947   EG436135   V1rd21   EG667240   LOC100043067   EG435940                                                    | -2.01 |
| 10560728 | predicted gene, EG436135   vomeronasal 1 receptor, D16                                  | Gm1447   V1rd13   V1rd16   EG667599   EG435947   ENSMUSG00000074330   EG436135   V1rd21   EG667240   LOC100043067   EG435940   ENSMUSG00000074310 | -2.03 |

|          |                                                                                           |                                                                                                                                                                                                                                                                                                                                  |              |
|----------|-------------------------------------------------------------------------------------------|----------------------------------------------------------------------------------------------------------------------------------------------------------------------------------------------------------------------------------------------------------------------------------------------------------------------------------|--------------|
| 10560740 | predicted gene, ENSMUSG00000074310   predicted gene, 670764   vomeronasal 1 receptor, D21 | ENSMUSG00000074330   V1rd21   EG667240   670764   ENSMUSG00000074310                                                                                                                                                                                                                                                             | <b>-2.05</b> |
| 10560787 | predicted gene, EG667551   predicted gene, ENSMUSG00000074310                             | EG667283   EG667273   ENSMUSG00000074330   V1rd21   EG667240   EG667551   100043559   ENSMUSG00000074310                                                                                                                                                                                                                         | <b>-2.05</b> |
| 10416689 | olfactomedin 4                                                                            | Olfm4                                                                                                                                                                                                                                                                                                                            | <b>-2.05</b> |
| 10560730 | predicted gene, 620758   predicted gene, EG667586                                         | EG667504   EG667586   ENSMUSG00000074330   620758   V1rd21   EG667240   V1rd15   EG667404   ENSMUSG00000074310                                                                                                                                                                                                                   | <b>-2.08</b> |
| 10560783 | predicted gene, 100043667   predicted gene, ENSMUSG00000074331                            | EG667215   EG667283   EG667504   EG667273   EG667464   EG667586   ENSMUSG00000074330   V1rd21   EG667240   V1rd15   EG667404   ENSMUSG00000074331   V1rd14   EG667551   100043559   100043667   ENSMUSG00000074310   EG667135   EG667469                                                                                         | <b>-2.08</b> |
| 10550782 | vomeronasal 1 receptor, D16   predicted gene, ENSMUSG00000074298                          | EG667186   EG667485   EG667215   EG435949   EG667283   621561   V1rd13   V1rd16   100042976   EG667464   EG435947   EG435953   V1rd21   670764   Gm1446   ENSMUSG00000074331   V1rd14   EG667551   100043559   EG667135   EG667469   100043061   ENSMUSG00000074298                                                              | <b>-2.10</b> |
| 10550786 | predicted gene, EG667551   predicted gene, EG667283                                       | EG667283   EG667551   100043559                                                                                                                                                                                                                                                                                                  | <b>-2.12</b> |
| 10358615 | hemicentin 1                                                                              | Hmcn1                                                                                                                                                                                                                                                                                                                            | <b>-2.13</b> |
| 10560785 | predicted gene, EG667551   predicted gene, ENSMUSG00000074310                             | EG667215   EG667283   ENSMUSG00000074330   V1rd21   EG667240   V1rd15   EG667551   100043559   ENSMUSG00000074310   EG667469                                                                                                                                                                                                     | <b>-2.13</b> |
| 10576944 | predicted gene, ENSMUSG00000059543                                                        | ENSMUSG00000059543                                                                                                                                                                                                                                                                                                               | <b>-2.14</b> |
| 10505237 | predicted gene, OTTMUSG00000025544                                                        | 620982   OTTMUSG00000025544   OTTMUSG00000007425   OTTMUSG00000008510                                                                                                                                                                                                                                                            | <b>-2.14</b> |
| 10560754 | predicted gene, EG667551   predicted gene, EG667283                                       | EG667283   EG667551   100043559                                                                                                                                                                                                                                                                                                  | <b>-2.14</b> |
| 10556145 | olfactory receptor 498                                                                    | Olf498                                                                                                                                                                                                                                                                                                                           | <b>-2.18</b> |
| 10461806 | olfactory receptor 1471                                                                   | Olf1471                                                                                                                                                                                                                                                                                                                          | <b>-2.18</b> |
| 10505240 | predicted gene, OTTMUSG00000025544                                                        | 620982   OTTMUSG00000025544   OTTMUSG00000007425   OTTMUSG00000008510                                                                                                                                                                                                                                                            | <b>-2.21</b> |
| 10373622 | olfactory receptor 772   olfactory receptor 773                                           | Olf773   Olf772                                                                                                                                                                                                                                                                                                                  | <b>-2.26</b> |
| 10466351 | olfactory receptor 1459                                                                   | Olf1459                                                                                                                                                                                                                                                                                                                          | <b>-2.34</b> |
| 10550760 | predicted gene, 620758   vomeronasal 1 receptor, D16                                      | EG667186   EG667485   EG667215   EG435949   EG667283   673902   EG667504   621561   EG667273   V1rd13   V1rd16   EG667472   EG667599   100042976   EG667464   EG667586   EG435947   EG435953   ENSMUSG00000074330   620758   V1rd21   EG667240   670764   Gm1446   EG667404   ENSMUSG00000074331   V1rd14   EG667551   100043559 | <b>-2.37</b> |

|          |                                                                                                                         |                                                                                                                      |              |
|----------|-------------------------------------------------------------------------------------------------------------------------|----------------------------------------------------------------------------------------------------------------------|--------------|
|          |                                                                                                                         | EG435940   EG667135   EG667469  <br>100043061   ENSMUSG00000074298                                                   |              |
| 10450731 | MHC class Ib T9                                                                                                         | H2-t9                                                                                                                | <b>-2.37</b> |
| 10414262 | eosinophil-associated, ribonuclease A family, member 2                                                                  | Ear2                                                                                                                 | <b>-2.39</b> |
| 10524068 | vomeronasal 2, receptor 17                                                                                              | Vmn2r17                                                                                                              | <b>-2.41</b> |
| 10598175 | eosinophil-associated, ribonuclease A family, member 3  <br>eosinophil-associated, ribonuclease A family, member 1      | Ear10   Ear12   Ear3   Ear1   Ear2                                                                                   | <b>-2.48</b> |
| 10397551 | predicted gene, 100042776   expressed sequence<br>BB287469   predicted gene, 100039100                                  | 100042776   BB287469   100039100                                                                                     | <b>-2.49</b> |
| 10473399 | proteoglycan 2, bone marrow                                                                                             | Prg2                                                                                                                 | <b>-2.50</b> |
| 10550193 | predicted gene, 100042762   predicted gene, 100042677                                                                   | LOC100039390   100042677  <br>ENSMUSG00000074371   100042728  <br>LOC100039371   Obox4   100042762  <br>LOC100039416 | <b>-2.53</b> |
| 10473406 | proteoglycan 3                                                                                                          | Prg3                                                                                                                 | <b>-2.55</b> |
| 10550189 | oocyte specific homeobox 4                                                                                              | Obox4                                                                                                                | <b>-2.55</b> |
| 10373630 | olfactory receptor 801                                                                                                  | Olf801                                                                                                               | <b>-2.73</b> |
| 10505254 | predicted gene, OTTMUSG00000025544                                                                                      | 620982   OTTMUSG00000025544  <br>OTTMUSG00000007425  <br>OTTMUSG00000008510                                          | <b>-2.74</b> |
| 10473469 | olfactory receptor 1020                                                                                                 | Olf1020                                                                                                              | <b>-2.75</b> |
| 10419156 | eosinophil-associated, ribonuclease A family, member 3  <br>eosinophil-associated, ribonuclease A family, member 1      | Ear10   Ear12   Ear3   Ear1   Ear2                                                                                   | <b>-2.75</b> |
| 10556141 | olfactory receptor 495                                                                                                  | Olf495                                                                                                               | <b>-2.84</b> |
| 10566194 | olfactory receptor 578                                                                                                  | Olf578                                                                                                               | <b>-2.95</b> |
| 10505249 | predicted gene, OTTMUSG00000025544                                                                                      | 620982   OTTMUSG00000025544  <br> OTTMUSG00000007425<br> OTTMUSG00000008510                                          | <b>-3.05</b> |
| 10559890 | vomeronasal 2, receptor 35   vomeronasal 2, receptor 43<br>  vomeronasal 2, receptor 50   vomeronasal 2, receptor<br>39 | Vmn2r39   Vmn2r50   Vmn2r35  <br>Vmn2r43                                                                             | <b>-3.09</b> |
| 10538871 | immunoglobulin kappa chain variable 28 (V28)                                                                            | Igk-V28                                                                                                              | <b>-3.21</b> |
| 10505246 | predicted gene, OTTMUSG00000025544                                                                                      | 620982   OTTMUSG00000025544  <br>OTTMUSG00000007425  <br>OTTMUSG00000008510                                          | <b>-3.22</b> |
| 10505258 | predicted gene, OTTMUSG00000025544                                                                                      | 620982   OTTMUSG00000025544  <br>OTTMUSG00000007425  <br>OTTMUSG00000008510                                          | <b>-3.22</b> |
| 10419154 | eosinophil-associated, ribonuclease A family, member 3  <br>eosinophil-associated, ribonuclease A family, member 1      | Ear10   Ear12   Ear3   Ear2   Ear1                                                                                   | <b>-3.30</b> |
| 10419151 | eosinophil-associated, ribonuclease A family, member 1                                                                  | Ear1                                                                                                                 | <b>-3.35</b> |
| 10414590 | eosinophil-associated, ribonuclease A family, member 7  <br>eosinophil-associated, ribonuclease A family, member 6      | Ear7   Ear6                                                                                                          | <b>-3.54</b> |

Supplementary Table 2. **Primers used for real-time PCR.**

| <b>Gene</b> | <b>Accession #</b> | <b>Sequence</b>                                                                       | <b>Purpose</b>      |
|-------------|--------------------|---------------------------------------------------------------------------------------|---------------------|
| Satb1       | NM_001163630.1     | FW 5'- CTC CAT TGA ATA TGA TTG CAA-3'<br>RV 5'- TCC AAC CTG GAT TAG CCC TTT-3'        | mRNA quantification |
| Gapdh       | NM_008084.2        | FW 5'- CCA GCC TCG TCC CGT AGA C-3'<br>RV 5'- GCC TTG ACT GTG CCG TTG-3'              | mRNA quantification |
| Numb        | NM_001136075.1     | FW 5'- ATG AGT TGC CTT CCA CTA TGC AG-3'<br>RV 5'- TGC TGA AGG CAG TGG TGA TCT GG-3'  | mRNA quantification |
| Clasp1      | NM_001081276.1     | FW 5'- GTG CTG GCA GCC GGT CAA GT-3'<br>RV 5'- CGG CTG CTC CGT GCT AAT CC-3'          | mRNA quantification |
| Rbbp9       | NM_015754.2        | FW 5'- GCG CGA GAG AGC ATC TGG CT-3'<br>RV 5'- GGG GCG GCT GAA GTA CCC ACT-3'         | mRNA quantification |
| Kdm3a       | NM_001038695.2     | FW 5'- TGG GCG GCT GGG CTC TGT TG-3'<br>RV 5'- AGG GCT CCT CCC TTT CAA AGC TGG-3'     | mRNA quantification |
| Chaf1a      | NM_013733.3        | FW 5'- CCA TCA TCC GCC CCC GGA AC-3'<br>RV 5'- TGC ACA CTC CTC AGT CAC GCC T-3'       | mRNA quantification |
| Bgn         | NM_007542.4        | FW 5'- GTT GGC CCT GACGGA CAG AC-3'<br>RV 5'- GCC AGC AGC AAG GTG AGT AG-3'           | mRNA quantification |
| c-Myc       | NM_010849.4        | FW 5'- ACA GGA CTC CCC AGG CTC CG-3'<br>RV 5'- CGT GGC TGT CTG CGG GGT TT-3'          | mRNA quantification |
| Tlr4        | NM_021297.2        | FW 5'- GCT TTC ACC TCT GCC TTC AC-3'<br>RV 5'- AGG CGA TAC AAT TCC ACC TG-3'          | mRNA quantification |
| Uhrf2       | NM_144873.2        | FW 5'- CGA GCG CAG GGC CAG ACA AA-3'<br>RV 5'- TTT CCA ACT GCT TGC CCC GGT-3'         | mRNA quantification |
| Irf1R       | NM_010513.2        | FW 5'- GCT TCG TTA TCC ACG ACG ATG-3'<br>RV 5'- GAA TGG CGG ATC TTC ACG TAG-3'        | mRNA quantification |
| Ipnr1       | NM_010585.5        | FW 5'- GCG TTT CCT CAA GCC TGC CG-3'<br>RV 5'- ATC AGC TCC TTG GTG ACC GGG-3'         | mRNA quantification |
| Tnik        | NM_026910.1        | FW 5'- GCA GCG GAC AAG CAG TGG CA-3'<br>RV 5'- GCT TTC TTA TAG CTA GCT GGC CGA C-3'   | mRNA quantification |
| Hes1        | NM_008235.2        | FW 5'-AAA GCC TAT CAT GGA GAA GAG GCG -3'<br>RV 5'-GGA ATG CCG GGA GCT ATC TTT CTT-3' | mRNA quantification |
| Hes5        | NM_010419.4        | FW 5'-GCG TCG GGA CCG CAT CAA CA -3'                                                  | mRNA quantification |

|      |             |                                       |                     |
|------|-------------|---------------------------------------|---------------------|
|      |             | RV 5'-GCG GCG AAG GCT TTG CTG TG -3'  |                     |
| Dtx1 | NM_008052.3 | FW 5'-CTC CGG GTG CGC TCG TTG TG -3'  | mRNA quantification |
|      |             | RV 5'-CCG GAA CCC CAG GCG GGA TA -3'  |                     |
| Hey1 | NM_010423.2 | FW 5'-CCA CGC TCC GCC ACC ATG AA -3'  | mRNA quantification |
|      |             | RV 5'-CGG CGC TTC TCG ATG ATG CCT -3' |                     |

Supplementary Table 3. **Primers used for chromatin immunoprecipitation.**

| Gene    | Accession # | Sequence                                                                    | Purpose |
|---------|-------------|-----------------------------------------------------------------------------|---------|
| Numb #1 | NC_000078.5 | FW 5'-AGG CTC CAT GTG GCT GGG GT-3'<br>RV 5'-CAG CAG GGA GTG GGC CAA GC-3'  | ChIP    |
| Numb #2 | NC_000078.5 | FW 5'-GCT GGC TCA GCG CTC TCC TG-3'<br>RV 5'-GCC AGA GTT ACC TGC CGC CC-3'  | ChIP    |
| Numb #3 | NC_000078.5 | FW 5'- TGC CGC TAG CAT ACC TGC CA-3'<br>RV 5'-CCC TTG CTT CGC CTC CCT GC-3' | ChIP    |
| Numb #4 | NC_000078.5 | FW 5'-TCC GGG ATC CAC CGG AAG GC-3'<br>RV 5'-CCC CAG CGC TTT TCC TGC TCC-3' | ChIP    |

Supplementary Table 4. **Quality control of ERRBS analysis.**

| Sample name (experiment#) | CpG covered | Mean CpG coverage | BS conversion rate (%) | Total read count | Uniquely aligned read count | Alignment (%) |
|---------------------------|-------------|-------------------|------------------------|------------------|-----------------------------|---------------|
| Satb1_KO_MPP (#1)         | 1770041     | 78.45             | 99.89                  | 121762313        | 61182793                    | 50.2          |
| Satb1_KO_HSC (#1)         | 2178665     | 93.7              | 99.9                   | 149398475        | 89566756                    | 60            |
| Satb1_WT_MPP (#1)         | 1474867     | 54.8              | 99.87                  | 120128863        | 34717628                    | 28.9          |
| Satb1_WT_HSC (#1)         | 2177247     | 112.43            | 99.82                  | 163263636        | 101048765                   | 61.9          |
| Satb1_KO_MPP (#2)         | 1642986     | 75.55             | 99.92                  | 105655411        | 50057713                    | 47.4          |
| Satb1_KO_HSC (#2)         | 1645776     | 98.52             | 99.93                  | 105975760        | 64009297                    | 60.4          |
| Satb1_WT_MPP (#2)         | 1636549     | 58.31             | 99.92                  | 101152392        | 36830336                    | 36.4          |
| Satb1_WT_HSC (#2)         | 1681312     | 50.65             | 99.91                  | 96316881         | 36771933                    | 38.2          |



Supplementary Table 5. **Genes with altered expression and cytosine methylation in *Satb1*<sup>-/-</sup> HSCs.**

| <b>Gene Symbol</b> | <b>Accession Number (RNA)</b> | <b>Accession Number (Genomic DNA)</b> | <b>Genomic Range</b> |
|--------------------|-------------------------------|---------------------------------------|----------------------|
| 1700113H08Rik      | NM_029685.1                   | NC_000076.6                           | 87058046..87230599   |
| 2900041M22Rik      | NR_015489.2                   | NC_000077.6                           | 117611247..117613417 |
| 4922501C03Rik      | NM_199316.2                   | NC_000075.6                           | 87191963..87255532   |
| 6720456H20Rik      | NM_172600.3                   | NC_000080.6                           | 48446352..48515159   |
| Adrbk2             | NM_001035531.1                | NC_000071.6                           | 112910478..113015514 |
| Aig1               | NM_025446.3                   | NC_000076.6                           | 13652709..13868830   |
| Arhgap17           | NM_001122640.1                | NC_000073.6                           | 123279149..123369915 |
| Atg4c              | NM_001145967.1                | NC_000070.6                           | 99193934..99259787   |
| Atp10a             | NM_009728.2                   | NC_000073.6                           | 58658202..58829426   |
| Atpbd4             | NM_025675.4                   | NC_000068.7                           | 114516418..114654928 |
| Brms1              | NM_134155.1                   | NC_000085.6                           | 5041404..5049917     |
| Cblb               | NM_001033238.1                | NC_000082.6                           | 52031549..52208047   |
| Ccdc46             | NM_029586.2                   | NC_000077.6                           | 108425266..108860615 |
| Cd180              | NM_008533.2                   | NC_000079.6                           | 102693558..102706631 |
| Cep135             | NM_199032.2                   | NC_000071.6                           | 76591714..76646466   |
| Chd9               | NM_177224.2                   | NC_000074.6                           | 90828835..91054508   |
| Cyp4f16            | NM_024442.1                   | NC_000083.6                           | 32536629..32551797   |
| Ddit4              | NM_029083.2                   | NC_000076.6                           | 59949675..59951770   |
| Dnahc10            | NM_019536.1                   | NC_000071.6                           | 124725085..124834308 |
| Dnajc11            | NM_172704.3                   | NC_000070.6                           | 151933720..151981959 |
| Dpp4               | NM_001159543.1                | NC_000068.7                           | 62330073..62412231   |
| Drd5               | NM_013503.2                   | NC_000071.6                           | 38319509..38322310   |
| Dync1li2           | NM_001013380.2                | NC_000074.6                           | 104417674..104443047 |
| Dync2h1            | NM_029851.2                   | NC_000075.6                           | 6928503..7177046     |
| Eya2               | NM_001271962.1                | NC_000068.7                           | 165655298..165771631 |
| Frmd4a             | NM_001177843.1                | NC_000068.7                           | 4152863..4614043     |
| Fyn                | NM_001122892.1                | NC_000076.6                           | 39369799..39565381   |
| Ift81              | NM_009879.3                   | NC_000071.6                           | 122550204..122614518 |
| Ints6              | NM_008715.2                   | NC_000080.6                           | 62676325..62761112   |
| Itga8              | NM_001001309.2                | NC_000068.7                           | 12106660..12301920   |
| Itpr1              | NM_010585.5                   | NC_000072.6                           | 108213096..108551116 |
| Lrrn3              | NM_001271708.1                | NC_000078.6                           | 41451668..41485751   |
| Lrrtm2             | NM_178005.4                   | NC_000084.6                           | 35209003..35215024   |
| Maged1             | NM_019791.2                   | NC_000086.7                           | 94535474..94542074   |
| Mtap7              | NM_001198635.1                | NC_000076.6                           | 20148920..20281590   |
| Myst3              | NM_001081149.1                | NC_000074.6                           | 22859539..22943262   |
| Naglu              | NM_013792.2                   | NC_000077.6                           | 101070094..101077672 |
| Napg               | NM_028017.1                   | NC_000084.6                           | 62977916..62999450   |
| Nrxn1              | NM_020252.3                   | NC_000083.6                           | 90033644..91092802   |
| Parp11             | NM_181402.3                   | NC_000072.6                           | 127453723..127494239 |
| Pcdh1              | NM_029357.3                   | NC_000084.6                           | 38196694..38209762   |
| Pcmt1              | NM_183028.3                   | NC_000067.6                           | 7088920..7173628     |
| Plekha5            | NM_144920.3                   | NC_000072.6                           | 140424099..140594906 |

| Gene Symbol | Accession Number (RNA) | Accession Number (Genomic DNA) | Genomic Range        |
|-------------|------------------------|--------------------------------|----------------------|
| Procr       | NM_011171.2            | NC_000068.7                    | 155751217..155755478 |
| Prrg1       | NM_001164275.1         | NC_000086.7                    | 78449613..78583896   |
| Rab6b       | NM_173781.4            | NC_000075.6                    | 103112074..103185270 |
| Rasa2       | NM_053268.2            | NC_000075.6                    | 96539300..96631503   |
| Sectm1b     | NM_026907.3            | NC_000077.6                    | 121053423..121063569 |
| Sesn3       | NM_030261.4            | NC_000075.6                    | 14276301..14326134   |
| Smyd3       | NM_027188.3            | NC_000067.6                    | 178955031..179518003 |
| Snora69     | NR_002900.1            | NC_000086.7                    | 37082912..37083033   |
| Snx25       | NM_207213.2            | NC_000074.6                    | 46033261..46124146   |
| Socs2       | NM_001168655.1         | NC_000076.6                    | 95411490..95416857   |
| Tdrd3       | NM_001253755.1         | NC_000080.6                    | 87416583..87545508   |
| Tnik        | NM_001163007.1         | NC_000069.6                    | 28263214..28670585   |
| Trim33      | NM_001079830.1         | NC_000069.6                    | 103279293..103358768 |
| Tsc22d1     | NM_001177751.1         | NC_000080.6                    | 76415821..76507766   |
| Tspan4      | NM_001252588.1         | NC_000073.6                    | 141475236..141493427 |
| Tspan5      | NM_019571.4            | NC_000069.6                    | 138742195..138904424 |
| Ttll5       | NM_001081423.2         | NC_000078.6                    | 85824950..86053760   |
| Txndc2      | NM_001146002.1         | NC_000083.6                    | 65637505..65642204   |
| Usp36       | NM_001033528.1         | NC_000077.6                    | 118259653..118290244 |
| Wdr5        | NM_080848.2            | NC_000068.7                    | 27515147..27536535   |
| Whsc1       | NM_001081102.2         | NC_000071.6                    | 33843112..33897966   |
| Xirp2       | NM_001024618.2         | NC_000068.7                    | 67446002..67526606   |
| Zfp661      | NM_001111029.1         | NC_000068.7                    | 127575533..127584677 |
| Zfp84       | NM_023750.2            | NC_000073.6                    | 29768552..29781419   |

Supplementary Table 6. **Network analysis of gene set with altered expression and cytosine methylation in *Satb1*<sup>-/-</sup> HSCs by Ingenuity Pathway Analysis.**

| Molecules in Network                                                                                                                                                                                                                                                    | Score | Focus Molecules | Top Functions                                                                                  |
|-------------------------------------------------------------------------------------------------------------------------------------------------------------------------------------------------------------------------------------------------------------------------|-------|-----------------|------------------------------------------------------------------------------------------------|
| ADRBK2,APH1B,ARHGEF2,CASP3,CD180,CTNNB1, DDIT4,DPP4,DRD5,ERK1/2,HRAS,IPO7,ITPR1,MAP7, miR-17-3p (and other miRNAs w/seed CUGCAGU),MYC, NAP1L1,PERP,PLD1,PLEKHA5,PPT1,PROCR,PTPN14, RABEP1,RAD23A,SEMA3C,SESN1,SESN3,SH3BP4,SMYD3, TMSB10/TMSB4X,TNIK,TP53,TSC22D1,YWHAG | 24    | 13              | Cell-To-Cell Signaling and Interaction, Cellular Assembly and Organization, Tissue Development |
| ARHGAP17,ATAD2,BRCA2,CBLB,CCND1,CD28,CDCA4, CDCA7,CDCA7L,CDK5RAP2,CHD9,DLEU1,DLEU2,E2F1, ERG,EYA2,FLNA,FYN,LRRN3,LRRTM2,MAGED1,MAX, MGEA5,MTHFD1,PTK2B,PTPN4,RASA2,SKAP1,SOCS2, STARD4,TAF5L,TSPAN4,TSPAN5,UTRN,WDR5                                                    | 24    | 13              | Cancer, Hematological Disease, Reproductive System Disease                                     |
